# Supplementary material for: GPs' attitudes, beliefs and behaviours regarding exercise for chronic knee pain: a questionnaire survey
Source: PubMed Central journal article supplement (PMC5541518; doi:10.1136/bmjopen-2016-014999), 2017-06-17
Supplement: bmjopen-2016-014999.draft_revisions.pdf [file bmjopen-2016-014999.draft_revisions.pdf]

# BMJ Open

## GP attitudes, beliefs and behaviours regarding exercise for chronic knee pain: a questionnaire survey

|                                 |                                                                                                                                                                                                                                                                                                                                                                                                                                                                                                                                                                                                                                                            |
|---------------------------------|------------------------------------------------------------------------------------------------------------------------------------------------------------------------------------------------------------------------------------------------------------------------------------------------------------------------------------------------------------------------------------------------------------------------------------------------------------------------------------------------------------------------------------------------------------------------------------------------------------------------------------------------------------|
| Journal:                        | <i>BMJ Open</i>                                                                                                                                                                                                                                                                                                                                                                                                                                                                                                                                                                                                                                            |
| Manuscript ID                   | bmjopen-2016-014999                                                                                                                                                                                                                                                                                                                                                                                                                                                                                                                                                                                                                                        |
| Article Type:                   | Research                                                                                                                                                                                                                                                                                                                                                                                                                                                                                                                                                                                                                                                   |
| Date Submitted by the Author:   | 02-Nov-2016                                                                                                                                                                                                                                                                                                                                                                                                                                                                                                                                                                                                                                                |
| Complete List of Authors:       | Cottrell, Elizabeth ; Keele University, Research Institute for Primary Care & Health Sciences<br>Foster, Nadine; Keele University, Arthritis Research UK Primary Care Centre, Research Institute of Primary Care and Health Sciences<br>Porcheret, Mark; Keele University, Arthritis Research UK Primary Care Centre, Research Institute of Primary Care and Health Sciences<br>Rathod, Trishna; Keele University, Arthritis Research UK Primary Care Centre, Research Institute of Primary Care and Health Sciences<br>Roddy, Edward; Keele University, Arthritis Research UK Primary Care Centre, Research Institute of Primary Care and Health Sciences |
| <b>Primary Subject Heading</b>: | General practice / Family practice                                                                                                                                                                                                                                                                                                                                                                                                                                                                                                                                                                                                                         |
| Secondary Subject Heading:      | Evidence based practice, Rheumatology                                                                                                                                                                                                                                                                                                                                                                                                                                                                                                                                                                                                                      |
| Keywords:                       | Knee < ORTHOPAEDIC & TRAUMA SURGERY, osteoarthritis, exercise, general practitioners, surveys and questionnaires, attitude                                                                                                                                                                                                                                                                                                                                                                                                                                                                                                                                 |
|                                 |                                                                                                                                                                                                                                                                                                                                                                                                                                                                                                                                                                                                                                                            |

SCHOLARONE™  
Manuscripts

1  
2  
3 1 **GP attitudes, beliefs and behaviours regarding exercise for chronic**  
4  
5 2 **knee pain: a questionnaire survey**  
6  
7

8 3 Elizabeth Cottrell MBChB(Hons), MRCP, Ph.D.\*^, Nadine E. Foster BSc(Hons), DPhil,  
9 4 FCSP\*, Mark Porcheret MBBS, FRCGP, Ph.D.\*, Trishna Rathod MSc\*, Edward Roddy DM,  
10 5 FRCP\*  
11  
12

13  
14  
15 6 \*Arthritis Research UK Primary Care Centre, Research Institute for Primary Care and Health  
16 7 Sciences, Keele University, UK  
17

18  
19  
20 8 ^Corresponding author: Arthritis Research UK Primary Care Centre, Research Institute for  
21 9 Primary Care and Health Sciences, Keele University, Keele, Staffordshire, ST5 5BG.  
22

23  
24 10 Telephone: 01782 734870. Fax: 01782 734719. Email: [e.cottrell@keele.ac.uk](mailto:e.cottrell@keele.ac.uk)  
25

26  
27 11 **KEY WORDS**  
28

29  
30 12 Chronic knee pain, osteoarthritis, exercise, general practitioners, surveys and  
31 13 questionnaires, attitude  
32

33  
34 14 **Word count** excluding title page, abstract, references, tables and figures: 2862  
35

36  
37 15 Number of tables and figures: Figures 2, Tables 4  
38

39  
40 16  
41  
42  
43  
44  
45  
46  
47  
48  
49  
50  
51  
52  
53  
54  
55  
56  
57  
58  
59  
60

1  
2  
3 17 **ABSTRACT**  
4

5  
6 18 **Objectives:**  
7

8  
9 19 The aim of this study was to investigate general practitioners' (GPs) attitudes, beliefs and  
10  
11 20 behaviours regarding the use of exercise for patients with chronic knee pain (CKP)  
12  
13 21 attributable to osteoarthritis.  
14

15  
16 22 **Setting:**  
17

18  
19 23 Primary care GPs in the UK.  
20

21  
22 24 **Participants:**  
23

24  
25 25 5000 GPs, randomly selected from Binley's database, were mailed a cross-sectional  
26  
27 26 questionnaire survey.  
28

29  
30 27 **Outcome measures:**  
31

32  
33 28 GPs' attitudes and beliefs were investigated using attitude statements, and reported  
34  
35 29 behaviours were identified using vignette-based questions. GPs were invited to report  
36  
37 30 barriers experienced when initiating exercise with patients with CKP.  
38

39  
40 31 **Results:**  
41

42  
43 32 835 (17%) GPs responded. Overall, GPs were positive about general exercise for CKP. 729  
44  
45 33 (87%) reported using exercise, of which, 538 (74%) reported that they would use both  
46  
47 34 general and local (lower limb) exercises. However, only 92 (11% of all responding) GPs  
48  
49 35 reported initiating exercise in ways aligning with best-evidence recommendations. 815 (98%)  
50  
51 36 GPs reported barriers in using exercise for patients with CKP, most commonly, insufficient  
52  
53 37 time in consultations (n=419; 51%) and insufficient expertise (n=337; 41%).  
54

55  
56 38 **Conclusions:**  
57  
58  
59  
60

1  
2  
3 39 While GPs' attitudes and beliefs regarding exercise for CKP were generally positive,  
4  
5 40 initiation of exercise was often poorly aligned with current recommendations, and barriers  
6  
7 41 and uncertainties were reported. GPs' use of exercise may be improved by addressing the  
8  
9 42 key barriers of time and expertise, by developing a pragmatic approach that supports GPs to  
10  
11 43 initiate individualised exercise, and/or by other professionals taking on this role.  
12  
13  
14  
15  
16

### 17 **STRENGTHS AND LIMITATIONS OF THIS STUDY**

- 19 • This large UK survey is the first known to directly, specifically and concurrently  
20 investigate the attitudes, beliefs and behaviours of GPs regarding exercise for  
21 patients with CKP. Exercise initiation did not concur with best-evidence  
22 recommendations and GPs reported uncertainties and barriers in relation to  
23 using exercise.  
24  
25
- 26 • The use of a pre-tested vignette to investigate this topic ensured a consistent  
27 patient scenario to all GPs and minimised the confounders inherent in  
28 observational research using real patients.  
29
- 30 • Limitations of this study include the likely over-estimation of exercise use among  
31 GPs given the low response rate (response bias), the self-report nature of the  
32 questionnaire (social desirability bias) and the relatively uncomplicated vignette  
33 case. However, as GPs should be using exercise for all patients with CKP, the  
34 results of this survey are valuable for indicating an apparent evidence-practice  
35 gap in the way in which GPs employ exercise with this patient group.  
36  
37  
38  
39  
40  
41  
42  
43  
44  
45  
46  
47  
48  
49

50 44

51  
52  
53 45

### 54 55 56 46 **ABBREVIATIONS**

1  
2  
3 47 CI = confidence interval; CKP = chronic knee pain; EULAR = European League Against  
4  
5 48 Rheumatism; GP = general practitioners; HCP = healthcare professional; MDS = minimum  
6  
7 49 data set; NICE = National Institute for Health and Care Excellence; OA = osteoarthritis;  
8  
9 50 OARSI = Osteoarthritis Research Society International; OR = odds ratio; UK = United  
10  
11 51 Kingdom  
12  
13  
14  
15  
16  
17  
18  
19  
20  
21  
22  
23  
24  
25  
26  
27  
28  
29  
30  
31  
32  
33  
34  
35  
36  
37  
38  
39  
40  
41  
42  
43  
44  
45  
46  
47  
48  
49  
50  
51  
52  
53  
54  
55  
56  
57  
58  
59  
60

For peer review only

## 52 INTRODUCTION

53 General practitioners (GPs) are the most frequently accessed source of formal medical  
54 advice and treatment for patients in the UK with chronic knee pain (CKP).[1-3] CKP is  
55 defined in this study as being synonymous with clinical knee osteoarthritis (OA),[4] that is;  
56 mechanical knee pain, with or without loss of function, and with or without radiographic  
57 changes consistent with OA, that has lasted for at least three months in people aged 45  
58 years and older,[5] and for which an alternative diagnosis is unlikely.[4] Globally, OA is  
59 among the leading causes of years lived with disability,[6] thus it is unsurprising that CKP is  
60 a common presentation to GPs.[7,8] Exercise, comprising of both local (lower limb focused)  
61 and general (aerobic) exercise, is recommended as core treatment for CKP,[4,9] its  
62 provision is one of the eight UK OA quality standards[10] and international OA experts  
63 recognise provision of information about regular physical activity and individualised exercise  
64 to patients as essential.[11] Empirical research evidence now unequivocally demonstrates  
65 that general aerobic, local strengthening and flexibility exercises improve pain and function  
66 in patients with CKP.[12] In line with wider self-management strategies, best practice with  
67 regards to integrating exercise into the management of patients with CKP involves providing  
68 verbal advice about both general and local exercise (which should be specific and  
69 individualised[4,13]) supported with written information.[4] Where GPs feel unable to provide  
70 specific and individualised advice, referral of patients to appropriate exercise specialists (e.g.  
71 physiotherapist) would be appropriate.

72 To maximise patient outcomes, GPs should align their management with best-evidence  
73 recommendations. As sociocognitive behavioural theories suggest an association between  
74 individuals' attitudes and beliefs and their behaviours,[14-16] concurrent investigation of  
75 attitudes, beliefs and behaviours of GPs was undertaken. A systematic review revealed a  
76 paucity of data specifically examining GPs use of exercise for patients with CKP, however  
77 attitudes regarding exercise were variable, it appeared to be underused and its  
78 implementation by GPs was unclear.[5] The aim of this cross-sectional questionnaire survey

1  
2  
3 79 was to identify the attitudes, beliefs and behaviours of UK GPs regarding the use of exercise  
4  
5 80 for patients with CKP.  
6

## 7 81 **METHODS**

8  
9  
10 82 A cross-sectional survey was used to investigate GPs attitudes, beliefs and behaviours  
11  
12 83 regarding exercise for CKP. The survey tool had previously been developed through pre-  
13  
14 84 testing by a local group of GPs and a subsequent pilot study with 172 UK GPs,[17] which  
15  
16 85 was designed to investigate the likely response to the questionnaire, to finalise the survey  
17  
18 86 tool and to test methods to maximise quantity and quality of responses.  
19

20  
21 87 In this main study, GPs were mailed an eight-page questionnaire (see Supplementary File  
22  
23 88 1), a cover letter and a postage-paid reply envelope in January 2014. Non-responders were  
24  
25 89 sent a reminder postcard after two weeks and, four weeks after the initial mailing, persistent  
26  
27 90 non-responders were mailed a second copy of the questionnaire with a cover letter and  
28  
29 91 postage-paid reply envelope. At each stage non-responders who did not wish to complete  
30  
31 92 the full questionnaire were invited to provide minimum data sets (MDS; gender, year of  
32  
33 93 qualification, practice size and setting). Attitude statements associated with a five-point Likert  
34  
35 94 scale explored GPs' attitudes and beliefs about exercise for CKP. These were minimally  
36  
37 95 adapted from the work of Holden and colleagues who investigated this among  
38  
39 96 physiotherapists[18] and older adults with CKP[19] and were derived from the MOVE  
40  
41 97 consensus recommendations, designed to help healthcare professionals (HCPs) to initiate  
42  
43 98 exercise in the management of a patient with lower limb OA[20]. GPs' reported clinical  
44  
45 99 behaviour was investigated using multiple response questions associated with a vignette  
46  
47 100 case (see Table 1). GPs reporting to use exercise were requested to indicate the type of  
48  
49 101 exercise and how this was initiated. A multiple response item, with space for free-text,  
50  
51 102 investigated GPs' experiences of barriers to using exercise for CKP. Completion and return  
52  
53 103 of the questionnaire by the GP was interpreted as consent to participate in the study.  
54

55  
56 104

105

106 **Table 1 Vignette used in the questionnaire to assess GPs' reported behaviours**

|                     |                                                                                                                                                                                                                                                                                                                                                                                                                                                                                                                                            |
|---------------------|--------------------------------------------------------------------------------------------------------------------------------------------------------------------------------------------------------------------------------------------------------------------------------------------------------------------------------------------------------------------------------------------------------------------------------------------------------------------------------------------------------------------------------------------|
| <b>Patient:</b>     | Mrs Jones, 58-year-old Prison Officer                                                                                                                                                                                                                                                                                                                                                                                                                                                                                                      |
| <b>History:</b>     | First presentation of gradually worsening bilateral knee pain (right worse than left) over 2 years<br>No history of trauma<br>Pain always present when walking and at rest, worst when climbing stairs. No night pain.<br>Managing activities of daily living. Difficulty gardening.<br>Stopped going to gym – thinks was making pain worse<br>Only treatment tried is ibuprofen once or twice when pain “really bad” – no benefit.<br>Came today finding work increasingly difficult due to the stairs<br>Usually well – no comorbidities |
| <b>Medication:</b>  | Nil                                                                                                                                                                                                                                                                                                                                                                                                                                                                                                                                        |
| <b>Examination:</b> | Body Mass Index 33<br>Knees – bilaterally no effusions. Joint tenderness upon palpation. Bilateral coarse crepitations.<br>Slightly reduced flexion of the right knee.<br>Hips – no abnormality detected                                                                                                                                                                                                                                                                                                                                   |

107 A minimum sample size of 288 responding GPs was required to estimate the use of  
 108 exercise, based on a conservative estimate of 75% reporting exercise use informed by the  
 109 pilot study[17] and a margin of error of <5%.[21] After increasing the minimum sample size  
 110 to adjust for other planned regression analyses (exploring associations between reported  
 111 exercise use and attitudes/beliefs (paper in preparation)) and anticipating a response rate of  
 112 20%,[17] 5000 UK GPs were randomly selected from Binley's database; a database  
 113 containing the contact details of GPs in the UK which is updated quarterly. Binley's extracted  
 114 a simple random sample of GPs from their database and removed and replaced any GPs  
 115 included in the sample used for the previous pilot study. Study exclusion criteria were not  
 116 being a GP and not having managed someone with CKP in the previous six months.

117 GPs' practice postcodes from each UK country were transformed into their corresponding  
 118 Index of Multiple Deprivation rank[22-25] and split into quintiles (1=most deprived, 5=least  
 119 deprived). Free-text responses underwent thematic analysis and responses to the GP  
 120 attitude statements were condensed into three categories ((strongly) disagree, neither  
 121 disagree nor agree, and (strongly) agree) before commencing descriptive analyses.  
 122 Responses to GP attitude statements were interpreted as follows: unanimity = 100%,  
 123 consensus = 75-99%, majority view = 51-74%, no consensus = 0-50%[18]. To assess for



1  
2  
3 124 possible response bias in questionnaire respondents versus MDS responders, demographic  
4  
5 125 data of each type of responders were compared using logistic regression to obtain  
6  
7 126 unadjusted odds ratio with 95% confidence interval (CI; gender, practice area deprivation  
8  
9 127 and practice type) and mean difference with 95% CI (mean years since qualification and  
10  
11 128 mean number of GPs in respondents practice). An *a posteriori* analysis was undertaken due  
12  
13 129 to the timing of the main survey coinciding with publication of the revised version of the NICE  
14  
15 130 OA guidelines on 12<sup>th</sup> February 2014 (four weeks after the baseline mailing of the survey).  
16  
17 131 To establish whether the publication of these guidelines, and the publicity associated with  
18  
19 132 this event had an impact on the proportion of GPs using exercise, logistic regression was  
20  
21 133 used to compare the use of exercise among responses received before the date of  
22  
23 134 publication of the revised guideline with those responses received after. All analyses were  
24  
25 135 performed using IBM SPSS Statistics (Version 20).

## 136 **RESULTS**

### 137 **Response**

138 Of the 5000 GPs sent the questionnaire, 58 responders met one or more exclusion criteria  
139 and 835 returned a completed questionnaire (adjusted response 17%). A further 470  
140 provided MDS. The characteristics of GPs responding with a MDS were similar to those  
141 responding with a full questionnaire, except they had been qualified for longer and were  
142 more likely to work in practices in the most deprived areas (Table 2). When compared to  
143 GPs with practice postcodes in the mid-deprived quintile (OR (95% CI)), those in the  
144 most deprived (0.72 (0.60,0.87)) and second most deprived (0.76 (0.62,0.92)) were  
145 significantly less likely to respond in any way (completed questionnaire or MDS),  
146 although the absolute difference in the proportions responding were small.

147

148

149 **Table 2 Demographic details of questionnaire respondents versus those providing minimum**  
 150 **data sets**

| Variable                                                                                                                                                                                 | Category              | Response type |                                 | OR/mean difference (95% CI)                  |
|------------------------------------------------------------------------------------------------------------------------------------------------------------------------------------------|-----------------------|---------------|---------------------------------|----------------------------------------------|
|                                                                                                                                                                                          |                       | MDS (n=470)   | Completed questionnaire (n=835) |                                              |
| <b>Gender</b>                                                                                                                                                                            | Male                  | 247 (53%)     | 401 (49%)                       | OR 1.00                                      |
|                                                                                                                                                                                          | Female                | 219 (47%)     | 417 (51%)                       | OR 1.17 (0.93,1.47)                          |
| <b>Practice area deprivation</b>                                                                                                                                                         | Most deprived         | 121 (26%)     | 181 (22%)                       | <b>OR 0.63 (0.45,0.89)</b>                   |
|                                                                                                                                                                                          | Second most deprived  | 106 (23%)     | 156 (19%)                       | <b>OR 0.62 (0.44,0.88)</b>                   |
|                                                                                                                                                                                          | Mid-deprived          | 85 (18%)      | 202 (24%)                       | OR 1.00                                      |
|                                                                                                                                                                                          | Second least deprived | 84 (18%)      | 160 (19%)                       | OR 0.80 (0.56,1.16)                          |
|                                                                                                                                                                                          | Least deprived        | 73 (16%)      | 135 (16%)                       | OR 0.78 (0.53,1.14)                          |
| <b>Practice type</b>                                                                                                                                                                     | Urban                 | 254 (56%)     | 449 (54%)                       | OR 1.00                                      |
|                                                                                                                                                                                          | Semi-rural            | 155 (34%)     | 275 (33%)                       | OR 1.00 (0.78,1.29)                          |
|                                                                                                                                                                                          | Rural                 | 43 (10%)      | 103 (13%)                       | OR 1.36 (0.92,2.00)                          |
| <b>Mean (SD) years since qualification</b>                                                                                                                                               |                       | 21.64 (10.03) | 18.40 (10.33)                   | Mean difference = <b>-3.24 (-2.06,-4.42)</b> |
| <b>Mean (SD) number of GPs in respondent's practice</b>                                                                                                                                  |                       | 6.44 (3.67)   | 6.44 (3.20)                     | Mean difference = <0.01 (-0.38,0.39)         |
| <b>Information only requested in questionnaire</b>                                                                                                                                       |                       |               |                                 |                                              |
| <b>Type of GP</b>                                                                                                                                                                        | GP partner            | ---           | 656 (79%)                       | ---                                          |
|                                                                                                                                                                                          | Salaried GP           | ---           | 151 (18%)                       | ---                                          |
|                                                                                                                                                                                          | Locum GP              | ---           | 20 (2%)                         | ---                                          |
|                                                                                                                                                                                          | Other                 | ---           | 5 (1%)                          | ---                                          |
| <b>GP with special interest in musculoskeletal conditions</b>                                                                                                                            |                       | ---           | 50 (6%)                         | ---                                          |
| <b>Received postgraduate education about CKP</b>                                                                                                                                         |                       | ---           | 319 (39%)                       | ---                                          |
| <b>Personal experience of CKP</b>                                                                                                                                                        |                       | ----          | 166 (20%)                       | ---                                          |
| Maximum missing data for any cell was 6%. CI = confidence interval; CKP = chronic knee pain, GP = general practitioner; MDS = minimum data set; OR = odds ratio; SD = standard deviation |                       |               |                                 |                                              |

151 **Attitudes of GPs regarding exercise for CKP**

152 Table 3 summarises responses to GP exercise attitude statements, none were unanimous.  
 153 Generally, GPs were more positive about general exercise than local exercise, particularly  
 154 with regards to safety and efficacy. However, more GPs agreed that increasing the strength  
 155 of the muscles around the knee stops the knee problem getting worse compared with those  
 156 who agreed that increasing overall physical activity would do the same. No consensus was  
 157 reached regarding the statement '*exercise works just as well for everybody, regardless of*  
 158 *the amount of pain they have*', however the greatest proportion of respondents disagreed.  
 159 GPs recognised the need to tailor exercises to individual patients, acknowledged the

1  
2  
3 160 importance of adherence with exercise but placed responsibility for adherence on the  
4  
5 161 patient.  
6  
7  
8  
9  
10  
11  
12  
13  
14  
15  
16  
17  
18  
19  
20  
21  
22  
23  
24  
25  
26  
27  
28  
29  
30  
31  
32  
33  
34  
35  
36  
37  
38  
39  
40  
41  
42  
43  
44  
45  
46  
47  
48  
49  
50  
51  
52  
53  
54  
55  
56  
57  
58  
59  
60

For peer review only

162 Table 3 Responses to GP attitude statements derived from the MOVE consensus recommendations [20]

| Attitude statement                                                                                                                                                                                                            | (Strongly) disagree | Neither disagree or agree | (Strongly) agree |
|-------------------------------------------------------------------------------------------------------------------------------------------------------------------------------------------------------------------------------|---------------------|---------------------------|------------------|
| <b>Items relating to the benefits of exercise (number of respondents)</b>                                                                                                                                                     |                     |                           |                  |
| GPs should prescribe quadriceps strengthening exercises to every patient with CKP (n=822)                                                                                                                                     | 8%                  | 22%                       | 69%              |
| GPs should prescribe general exercise, for example, walking or swimming, for every patient with CKP (n=824)                                                                                                                   | 3%                  | 8%                        | 89%              |
| Knee problems are improved by quadriceps strengthening exercises (n=824)                                                                                                                                                      | <1%                 | 11%                       | 88%              |
| Knee problems are improved by general exercise, for example, walking or swimming (n=824)                                                                                                                                      | 1%                  | 7%                        | 93%              |
| Quadriceps strengthening exercises for the knee are safe for everybody to do (n=821)                                                                                                                                          | 15%                 | 30%                       | 56%              |
| General exercise, for example, walking or swimming, is safe for everybody to do (n=820)                                                                                                                                       | 13%                 | 16%                       | 71%              |
| Exercise is effective for patients if an x-ray shows severe knee osteoarthritis (n=822)                                                                                                                                       | 16%                 | 32%                       | 52%              |
| Exercise works just as well for everybody, regardless of the amount of pain they have (n=823)                                                                                                                                 | 49%                 | 29%                       | 22%              |
| Increasing the strength of the muscles around the knee stops the knee problem getting worse (n=824)                                                                                                                           | 16%                 | 29%                       | 55%              |
| Increasing the overall activity levels stops the knee problem getting worse (n=822)                                                                                                                                           | 19%                 | 38%                       | 43%              |
| <b>Items relating to the delivery of, and adherence to, exercise (number of respondents)</b>                                                                                                                                  |                     |                           |                  |
| Exercise for CKP is most beneficial when it is tailored to meet individual patient needs (n=823)                                                                                                                              | 1%                  | 9%                        | 90%              |
| A standard set of exercises is sufficient for every patient with chronic knee problems (n=821)                                                                                                                                | 51%                 | 36%                       | 13%              |
| GPs should educate CKP patients about how to change their lifestyle for the better (n=823)                                                                                                                                    | 1%                  | 6%                        | 93%              |
| It is important that people with CKP increase their overall activity levels (n=824)                                                                                                                                           | 1%                  | 10%                       | 89%              |
| How well a patient complies with their exercise programme determines how effective it will be (n=825)                                                                                                                         | 3%                  | 11%                       | 86%              |
| GPs should follow-up patients to monitor extent of continuation of exercises (n=823)                                                                                                                                          | 30%                 | 37%                       | 34%              |
| It is the patient's own responsibility to continue doing their exercise programme (n=826)                                                                                                                                     | 1%                  | 6%                        | 93%              |
| Consensus categorised according to: unanimity = 100%, consensus = 75-99%, majority view = 51-74%, no consensus = 0-50% (18,26). CKP = chronic knee pain; GP = general practitioner. Maximum missing data for any item was 2%. |                     |                           |                  |

1  
2  
3  
4 163 **GPs' reported use of exercise for CKP**  
5

6 164 Of the 835 respondents, 729 (87%) reported using exercise of some type for the vignette  
7  
8 165 case. Figure 1 summarises the types of exercise and initiation methods that GPs reported  
9  
10 166 that they would use. Among GPs reporting to suggest general exercise (n=347), the most  
11  
12 167 common recommendations were swimming (49%), walking (41%) and cycling (34%). Only  
13  
14 168 17 (5%) GPs explicitly stated that general exercise should be tailored to patient's abilities  
15  
16 169 and/or interests. Among GPs reporting to use exercise, 413 (57%) stated they would achieve  
17  
18 170 this by referring the patient to a physiotherapist. Table 4 cross-tabulates the exercise  
19  
20 171 initiation strategies GPs reported to use for both general and local exercise and shows the  
21  
22 172 most common combinations of approaches were *suggesting* general exercise and  
23  
24 173 *demonstrating* local exercise, and giving the patient a leaflet about both exercise types.  
25  
26 174 Thirty-two (6%) GPs reporting to use both exercise types stated they would achieve this  
27  
28 175 solely by referring the patient to another HCP. Ninety-two GPs (11% of all respondents)  
29  
30 176 reported to use strategies aligned with evidence-based recommendations;<sup>[4]</sup> they advised,  
31  
32 177 or referred for, local and general exercise and provided written information for both exercise  
33  
34 178 types (Table 4). The use of exercise was not significantly different among responses  
35  
36 179 received after the publication of the revised NICE OA guidelines (273/314, 87%) when  
37  
38 180 compared with those received before (456/521, 88%; OR 0.95 (95% CI 0.62,1.44)).  
39  
40

41 181 **[INSERT Figure 1 Flow-chart summarising the exercise types and initiation methods used by**  
42  
43 182 **GPs' for the vignette patient with CKP]**  
44  
45  
46  
47  
48  
49  
50  
51  
52  
53  
54  
55  
56  
57  
58  
59  
60

183 Table 4 Methods used to initiate local and general exercise by GPs using both exercise types

| Methods used to include general exercises       | Methods used to include local exercises             |                    |                     |                         |                               |                           |                                |                                       |
|-------------------------------------------------|-----------------------------------------------------|--------------------|---------------------|-------------------------|-------------------------------|---------------------------|--------------------------------|---------------------------------------|
|                                                 | <i>Does not demonstrate, give leaflet nor refer</i> | <i>Refers only</i> | <i>Leaflet only</i> | <i>Demonstrate only</i> | <i>Demonstrate and refers</i> | <i>Leaflet and refers</i> | <i>Demonstrate and leaflet</i> | <i>Demonstrate, leaflet and refer</i> |
| <i>Does not suggest, give leaflet nor refer</i> | 0%                                                  | <1%                | 0%                  | <1%                     | 0%                            | 0%                        | <1%                            | 0%                                    |
| <i>Refers only</i>                              | <1%                                                 | <b>6%</b>          | <1%                 | 2%                      | <1%                           | <1%                       | <1%                            | <1%                                   |
| <i>Leaflet only</i>                             | 0%                                                  | 1%                 | <b>11%</b>          | 2%                      | <1%                           | <1%                       | <b>7%</b>                      | 1%                                    |
| <i>Suggest only</i>                             | 0%                                                  | 5%                 | 5%                  | <b>13%</b>              | 2%                            | <1%                       | 3%                             | <1%                                   |
| <i>Suggest and refer</i>                        | <1%                                                 | 1%                 | <1%                 | 2%                      | 2%                            | 0%                        | <1%                            | 0%                                    |
| <i>Leaflet and refer</i>                        | 0%                                                  | <1%                | 1%                  | 1%                      | <1%                           | 3%                        | 2%                             | 2%                                    |
| <i>Suggest and leaflet</i>                      | <1%                                                 | <1%                | 3%                  | 2%                      | <1%                           | <1%                       | <b>8%</b>                      | <1%                                   |
| <i>Suggest, leaflet and refer</i>               | 0%                                                  | <1%                | 1%                  | <1%                     | <1%                           | <1%                       | 1%                             | <1%                                   |

Management strategies used by >5% GPs are emboldened. The responses in the box are those that are consistent with evidence-based recommendations (i.e. providing advice and written information about both types of exercise and/or referring if needed). **n=535**

## 184 Use of follow-up

185 Of the 729 GPs reporting to use of exercise, 494 (68%) stated that they would follow-up the  
186 vignette patient to establish ongoing engagement with regular exercise. This was most  
187 commonly achieved through opportunistic follow-up (n=303, 61%) which most GPs (n=253,  
188 84%) suggested would occur if the vignette patient failed to improve and re-consulted.

## 189 Barriers to exercise use

190 Most GPs (n=815, 98%) reported having experienced barriers when using exercises for  
191 patients with CKP which included: 1) service-related, 2) GP-related and 3) (perceived)  
192 patient-related barriers (Figure 2). The most frequently reported barriers were insufficient  
193 time (n=419, 51%), insufficient expertise (n=337, 41%) and the perception that patients  
194 prefer other management options (n=291, 36%).

195 [INSERT Figure 2 Barriers to using exercise reported by GPs]

## 196 DISCUSSION

### 197 Summary

198 While most GPs agreed that they should 'prescribe' local and general exercise to all patients  
199 with CKP, believed that CKP is improved by local and general exercise, and reported that  
200 they would use exercise in the management of the vignette patient, only a tenth of  
201 responding GPs reported initiating exercise in a way that matches best-evidence  
202 recommendations.[4] This evidence-practice gap is perhaps unsurprising given that most  
203 GPs reported key barriers of time and expertise. A small number of GPs reported relying  
204 solely on referring the vignette patient to another HCP for both exercise types. This  
205 approach delays commencement of exercise as patients are not equipped to start exercising  
206 immediately after the consultation with the GP, relies on the receiving HCP delivering best  
207 practice and may not represent efficient use of services, if this is representative of GPs'  
208 usual approach for patients with CKP.

1  
2  
3 209 **Comparison with existing literature**  
4

5 210 Variable GP attitudes regarding exercise for CKP were recognised in an earlier systematic  
6  
7 211 review[5] and the uncertainty regarding exercise efficacy identified by the current study  
8  
9 212 supports this. GPs' responses to the MOVE attitude statements from the current study were  
10  
11 213 compared to those from physiotherapists[18] and older adults with CKP.[19] In contrast to  
12  
13 214 GPs being generally more positive regarding general exercise when compared to local  
14  
15 215 exercise, physiotherapists were generally more positive about the safety and efficacy of local  
16  
17 216 exercise,[18] and older adults with CKP reported low levels of agreement about the safety  
18  
19 217 and efficacy of both types of exercise.[19] Although GPs were more positive about the  
20  
21 218 efficacy and safety of both exercise types than either physiotherapists or those with CKP, the  
22  
23 219 timing of the respective surveys must be considered. In the time between the previous and  
24  
25 220 current surveys, new and/or revised versions of NICE,[4] Osteoarthritis Research Society  
26  
27 221 International (OARSI)[9] and European League Against Rheumatism (EULAR)[27] guideline  
28  
29 222 recommendations for OA have been published; thus familiarity with best-evidence  
30  
31 223 recommendations may have increased.

32  
33  
34 224 GPs' reported behaviour was consistent with higher estimates from other physician  
35  
36 225 questionnaire studies; between 9-89% of GPs advising exercise[5,28-30] and 10-77%  
37  
38 226 referring patients with CKP to physiotherapy[5,28-30]. Given that estimates of GPs' exercise  
39  
40 227 use are similar internationally, for example, advice to exercise was 46-76% in the UK[31,32]  
41  
42 228 and 12-59% in the USA[30,33-36], the results are likely to be relevant beyond the UK. The  
43  
44 229 most common general exercise suggestions (swimming, walking and cycling) were clinically  
45  
46 230 appropriate. Walking is acceptable to patients[37] and it improves function [38], whilst it is  
47  
48 231 also low impact, easily accessible,[38] adaptable to patient preferences and easy to  
49  
50 232 incorporate into everyday life. However, it is unclear how acceptable or realistic it is for  
51  
52 233 patients with CKP to engage in cycling or swimming.[39,40] For example, having to pay (e.g.  
53  
54 234 for equipment or instructors) is a recognised barrier to physical activity engagement.[13,41]  
55  
56 235 Combining the findings of uncertain appropriateness of (some) suggested modes of exercise  
57  
58  
59  
60



1  
2  
3 236 with only 5% of GPs using general exercise explicitly stating that their advice should be  
4  
5 237 tailored to their patients' interests and abilities, suggests a need for greater focus on  
6  
7 238 individualising exercise. As many GPs reported having insufficient time and expertise to use  
8  
9 239 exercise, referral to other HCPs may be appropriate. However physiotherapists report similar  
10  
11 240 uncertainties about the safety and efficacy of exercise[18] and suboptimal use of both  
12  
13 241 exercise types.[42] Therefore, relying on physiotherapists to deliver exercise interventions  
14  
15 242 may not ensure all patients receive tailored, specific instruction on both exercise types.  
16  
17 243 Finally, a third of respondents reported that they would opportunistically follow-up the  
18  
19 244 vignette patient to check adherence to exercise. However, previous research examining the  
20  
21 245 consultation behaviour of patients with CKP has shown that while many patients may consult  
22  
23 246 again with other health problems, CKP is often not recorded again.[43] Thus the GPs'  
24  
25 247 reported intentions regarding follow-up are likely to be unrealistically optimistic.

#### 27 248 **Strengths and limitations**

29  
30 249 This large UK survey is the first known to directly, specifically and concurrently investigate  
31  
32 250 the attitudes, beliefs and behaviours of GPs regarding exercise for patients with CKP.  
33  
34 251 Employing a vignette provided a consistent patient scenario to all GPs[44-47] and minimised  
35  
36 252 the confounders inherent in observational research using real patients.[45,46] Limitations of  
37  
38 253 this study include the likely over-estimation of exercise use among GPs given the low  
39  
40 254 response rate (response bias), the self-report nature of the questionnaire (social desirability  
41  
42 255 bias) and the relatively uncomplicated vignette case. However, as GPs should be using  
43  
44 256 exercise for all patients with CKP, the results of this survey are valuable for indicating an  
45  
46 257 apparent evidence-practice gap in the way in which GPs employ exercise with this patient  
47  
48 258 group.

#### 51 259 **Implications for future practice**

52  
53  
54 260 To deliver best practice for patients with CKP, strategies which target both GPs and the  
55  
56 261 wider primary care team are needed. Two key areas should be addressed: i) development of

1  
2  
3 262 a pragmatic approach for GPs to initiate individualised local and general exercise and ii)  
4  
5 263 identification of additional methods of initiating exercise and/or supporting patients to  
6  
7 264 continue with exercise that do not solely rely on GPs. Given that theoretical patient  
8  
9 265 behaviour change models[48] often involve a balance of perceived value and risks/burdens  
10  
11 266 of undertaking the new behaviour, a pragmatic approach for GPs initiating exercise among  
12  
13 267 patients with CKP would need to highlight the value of exercise to patients, its role relative to  
14  
15 268 other interventions and practical ways to undertake specific and individualised exercise.  
16  
17 269 Such a best practice approach was suggested by Khan et al[49] who recommended that  
18  
19 270 GPs should encourage the use of exercise (e.g. by asking about physical activity at each  
20  
21 271 consultation), consider the '5 A's' of physical activity counselling (assess, advise, agree,  
22  
23 272 assist and arrange),[50] write an exercise prescription,[51-53] and refer or signpost to  
24  
25 273 appropriate professionals or resources for exercise support and/or follow-up. Supplementary  
26  
27 274 written leaflets or 'guidebooks' seem to be acceptable and useful[54] and can be accessed  
28  
29 275 or signposted within consultations; for example, the Keele University OA guidebook[55] and  
30  
31 276 the Arthritis Research UK knee OA booklet.[56] Given that CKP patients commonly have  
32  
33 277 comorbidities[37,57,58] and multiple joint pain, GPs could use this opportunity to detect and  
34  
35 278 manage comorbid conditions that may directly impact the use of exercise (e.g.  
36  
37 279 cardiovascular disease, depression[59]), to relay the synergistic benefits of exercise for all  
38  
39 280 relevant morbidities, and to make explicit that CKP should not prevent exercise for other  
40  
41 281 conditions. Practical methods to help GPs provide the above information, in limited available  
42  
43 282 time, need to be developed and may include personalised written care plans.[60] Given that  
44  
45 283 time was the most frequently reported barrier to GPs initiating exercise, service delivery  
46  
47 284 models may need to change such that exercise initiation, support and/or follow-up is  
48  
49 285 primarily undertaken by other professionals such as physiotherapists,[61,62] practice  
50  
51 286 nurses,[63] health trainers or local gym personnel. Direct access may enhance patients'  
52  
53 287 utilisation of physiotherapists[64] and alternative, low GP burden, strategies could be  
54  
55 288 explored to promote exercise use and/or follow-up. For example, technology enabled care  
56  
57  
58  
59  
60

1  
2  
3 289 services[65] have shown promise when used to support exercise interventions among  
4  
5 290 patients with cardiac[66] and chronic lung disease.[67]  
6

## 7 291 **CONCLUSIONS**

8  
9  
10 292 Although the majority of UK GPs who responded to the questionnaire survey were positive  
11  
12 293 about exercise for patients with CKP and used exercise in their clinical management, this  
13  
14 294 survey identified GP uncertainties with respect to the safety and efficacy of exercise and  
15  
16 295 suboptimal approaches to the initiation of exercise with patients. GPs' use of exercise may  
17  
18 296 be improved by addressing the key barriers of time and expertise, by developing a pragmatic  
19  
20 297 approach that supports GPs to initiate individualised exercise with patients, and/or by other  
21  
22 298 professionals taking on this role.  
23

## 24 299 **ACKNOWLEDGEMENTS**

25  
26  
27  
28 300 We would like to thank the staff within the Research Institute for Primary Care and Health  
29  
30 301 Sciences who supported the study. Thanks also to the GPs who participated.  
31

## 32 302 **CONTRIBUTORSHIP STATEMENT**

33  
34  
35 303 EC, NF, MP, TR, and ER participated in the design of the study, analysis of the results and  
36  
37 304 helped to draft the manuscript. All authors read and approved the final manuscript.  
38  
39

## 40 305 **COMPETING INTERESTS**

41  
42  
43 306 The authors declare that they have no competing interests.  
44  
45

## 46 307 **DATA SHARING**

47  
48  
49 308 The datasets analysed during the current study available from the corresponding author on  
50  
51 309 reasonable request.  
52

## 53 310 **FUNDING**

54  
55  
56  
57  
58  
59  
60

1  
2  
3 311 This paper presents independent research funded by the Arthritis Research UK Centre in  
4  
5 312 Primary Care grant (Grant Number 20202). NF, an NIHR Senior Investigator, is supported  
6  
7 313 through an NIHR Research Professorship (NIHR-RP-011-015). EC was funded by an NIHR  
8  
9 314 Academic Clinical Fellowship and subsequently by School for Primary Care Research  
10  
11 315 bridging funds. The views expressed in this publication are those of the authors and not  
12  
13 316 necessarily those of the NHS, the NIHR or the Department of Health.

### 15 317 **ETHICAL APPROVAL**

18 318 Ethical approval for the study was obtained from Keele University (UK) Ethical Review  
19  
20 319 Panel.

### 23 320 **REFERENCES**

- 26 321 (1) Jordan KM, Sawyer S, Coakley P, Smith HE, Cooper C, Arden NK. The use of  
27 322 conventional and complementary treatments for knee osteoarthritis in the community.  
28 323 *Rheumatology (Oxford)* 2004;43(3):381-4.
- 30 324 (2) Jinks C, Ong BN, Richardson J. A mixed methods study to investigate needs assessment  
31 325 for knee pain and disability: population and individual perspectives. *BMC Musculoskelet*  
32 326 *Disord* 2007;8:59.
- 34 327 (3) Thorstensson CA, Gooberman-Hill R, Adamson J, Williams S, Dieppe P. Help-seeking  
35 328 behaviour among people living with chronic hip or knee pain in the community. *BMC*  
36 329 *Musculoskelet Disord* 2009;10:153.
- 38 330 (4) National Institute for Health and Care Excellence. Osteoarthritis: care and management  
39 331 in adults. 2014;CG177.
- 41 332 (5) Cottrell E, Roddy E, Foster NE. The attitudes, beliefs and behaviours of GPs regarding  
42 333 exercise for chronic knee pain: a systematic review. *BMC Fam Pract* 2010;11(4).
- 44 334 (6) Vos T, Barber RM, Bell B, Bertozzi-Villa A, Biryukov S, Bolliger I, et al. Global, regional,  
45 335 and national incidence, prevalence, and years lived with disability for 301 acute and chronic  
46 336 diseases and injuries in 188 countries, 1990–2013: a systematic analysis for the Global  
47 337 Burden of Disease Study 2013. *Lancet* 2015 2016/03;386(9995):743-800.
- 49 338 (7) Jordan KP, Kadam UT, Hayward R, Porcheret M, Young C, Croft P. Annual consultation  
50 339 prevalence of regional musculoskeletal problems in primary care: an observational study.  
51 340 *BMC Musculoskelet Disord* 2010;11:144.
- 53 341 (8) Arthritis Research UK National Primary Care Centre. Musculoskeletal matters.  
54 342 Consultations for selected diagnoses and regional problems. Musculoskeletal Matters  
55 343 2010;Bulletin 2.

- 1  
2  
3 344 (9) McAlindon TE, Bannuru RR, Sullivan MC, Arden NK, Berenbaum F, Bierma-Zeinstra SM,  
4 345 et al. OARSI guidelines for the non-surgical management of knee osteoarthritis.  
5 346 *Osteoarthritis Cartilage* 2014;22(3):363-88.
- 6  
7 347 (10) National Institute for Health and Care Excellence. Osteoarthritis NICE quality standard.  
8 348 QS87 ed. <http://www.nice.org.uk/guidance/qs87>: NICE; 2015.
- 9  
10 349 (11) French SD, Bennell KL, Nicolson PJ, Hodges PW, Dobson FL, Hinman RS. What do  
11 350 people with knee or hip osteoarthritis need to know? An international consensus list of  
12 351 essential statements for osteoarthritis. *Arthritis Care Res (Hoboken)* 2015 May;67(6):809-16.
- 13  
14 352 (12) Uthman OA, van der Windt DA, Jordan J, Dziedzic KS, Healey EL, Peat GM, et al.  
15 353 Exercise for lower limb osteoarthritis: systematic review incorporating trial sequential  
16 354 analysis and network meta-analysis. *BMJ* 2013;347:f5555.
- 17  
18 355 (13) Mazieres B, Thevenon A, Coudeyre E, Chevalier X, Revel M, Rannou F. Adherence to,  
19 356 and results of, physical therapy programs in patients with hip or knee osteoarthritis.  
20 357 Development of French clinical practice guidelines. *Joint Bone Spine* 2008;75(5):589-96.
- 21  
22 358 (14) Ajzen I. The theory of planned behavior. *Organ Behav Hum Decis Process* 1991  
23 359 12;50(2):179-211.
- 24  
25 360 (15) Michie S, Johnston M, Abraham C, Lawton R, Parker D, Walker A, et al. Making  
26 361 psychological theory useful for implementing evidence based practice: a consensus  
27 362 approach. *Qual Saf Health Care* 2005;14(1):26-33.
- 28  
29 363 (16) Godin G, Bélanger-Gravel A, Eccles M, Grimshaw J. Healthcare professionals'  
30 364 intentions and behaviours: a systematic review of studies based on social cognitive theories.  
31 365 *Implement Sci* 2008;3:36.
- 32  
33 366 (17) Cottrell E, Roddy E, Rathod T, Thomas E, Porcheret M, Foster N. Maximising response  
34 367 from GPs to questionnaire surveys: do length or incentives make a difference? *BMC Med*  
35 368 *Res Methodol* 2015;15(1):3.
- 36  
37 369 (18) Holden MA, Nicholls EE, Young J, Hay EM, Foster NE. UK-based physical therapists'  
38 370 attitudes and beliefs regarding exercise and knee osteoarthritis: findings from a mixed-  
39 371 methods study. *Arthritis Rheum* 2009;61(11):1511-21.
- 40  
41 372 (19) Holden MA, Nicholls EE, Young J, Hay EM, Foster NE. Role of exercise for knee pain:  
42 373 what do older adults in the community think? *Arthritis Care Res (Hoboken)*  
43 374 2012;64(10):1554-64.
- 44  
45 375 (20) Roddy E, Zhang W, Doherty M, Arden NK, Barlow J, Birrell F, et al. Evidence-based  
46 376 recommendations for the role of exercise in the management of osteoarthritis of the hip or  
47 377 knee - the MOVE consensus. *Rheumatology (Oxford)* 2005;44(1):67-73.
- 48  
49 378 (21) Zar J. Biostatistical analysis. 4th ed.: Prentice Hall; 1998.
- 50  
51 379 (22) Northern Ireland Statistics & Research Agency. Northern Ireland Multiple Deprivation  
52 380 Measure 2010. 2010; Available at: [http://www.nisra.gov.uk/deprivation/nimdm\\_2010.htm](http://www.nisra.gov.uk/deprivation/nimdm_2010.htm).  
53 381 Accessed January/06, 2015.
- 54  
55  
56  
57  
58  
59  
60

- 1  
2  
3 382 (23) Department for Communities and Local Government. English indices of deprivation  
4 383 2010. 2011; . Accessed December/12, 2014.
- 5  
6 384 (24) Welsh Government. Welsh Index of Multiple Deprivation (WIMD). 2014; Available at:  
7 385 <http://wales.gov.uk/statistics-and-research/welsh-index-multiple-deprivation/?lang=en>.  
8 386 Accessed January/06, 2015.
- 9  
10 387 (25) The Scottish Government. Scottish Index of Multiple Deprivation. 2014; Available at:  
11 388 <http://www.scotland.gov.uk/Topics/Statistics/SIMD>. Accessed December/12, 2014.
- 12  
13 389 (26) Mercer C, Jackson A, Moore A. Developing clinical guidelines for the physiotherapy  
14 390 management of whiplash associated disorder (WAD). *Int J Osteopath Med* 2007  
15 391 2014/12;10(2):50-4.
- 16  
17 392 (27) Fernandes L, Hagen KB, Bijlsma JWJ, Andreassen O, Christensen P, Conaghan PG, et  
18 393 al. EULAR recommendations for the non-pharmacological core management of hip and knee  
19 394 osteoarthritis. *Ann Rheum Dis* 2013;72(7):1125-35.
- 20  
21 395 (28) Arshad A, Rashid R, Das Gupta E. A survey of the primary care management of  
22 396 osteoarthritis in Malaysia: a view from a rheumatologist's perspective. *Int J Rheum Dis*  
23 397 2008;11(3):246-50.
- 24  
25 398 (29) Richette P, Hilliquin P, Bertin P, Carni P, Berger V, Marty M. Comparison of general  
26 399 practitioners and rheumatologists' prescription patterns for patients with knee osteoarthritis.  
27 400 *BMC Musculoskelet Disord* 2011;12:72.
- 28  
29 401 (30) Maserejian NN, Fischer MA, Trachtenberg FL, Yu J, Marceau LD, McKinlay JB, et al.  
30 402 Variations among primary care physicians in exercise advice, imaging, and analgesics for  
31 403 musculoskeletal pain: Results from a factorial experiment. *Arthritis Care Res (Hoboken)*  
32 404 2014;66(1):147-56.
- 33  
34 405 (31) Bedson J, Jordon K, Croft P. How do GPs use x rays to manage chronic knee pain in  
35 406 the elderly? A case study. *Ann Rheum Dis* 2003;62(5):450-4.
- 36  
37 407 (32) Porcheret M, Jordan K, Croft P. Treatment of knee pain in older adults in primary care:  
38 408 development of an evidence-based model of care. *Rheumatology (Oxford)* 2007;46(4):638-  
39 409 48.
- 40  
41 410 (33) Dexter PA. Joint exercises in elderly persons with symptomatic osteoarthritis of the hip  
42 411 or knee. Performance patterns, medical support patterns, and the relationship between  
43 412 exercising and medical care. *Arthritis Care Res* 1992;5(1):36-41.
- 44  
45 413 (34) Mazzuca SA, Brandt KD, Katz BP, Dittus RS, Freund DA, Lubitz R, et al. Comparison of  
46 414 general internists, family physicians and rheumatologists managing patients with symptoms  
47 415 of osteoarthritis of the knee. *Arthritis Care Res* 1997;10(5):289-99.
- 48  
49 416 (35) Glauser TA, Salinas GD, Roepke NL, Chad Williamson J, Reese A, Gutierrez G, et al.  
50 417 Management of mild-to-moderate osteoarthritis: a study of the primary care perspective.  
51 418 *Postgrad Med* 2011;123(1):126-34.
- 52  
53 419 (36) Mamlin LA, Melfi CA, Parchman ML, Gutierrez B, Allen DI, Katz BP, et al. Management  
54 420 of osteoarthritis of the knee by primary care physicians. *Arch Fam Med* 1998;7(6):563-7.
- 55  
56  
57  
58  
59  
60

- 1  
2  
3 421 (37) Holden MA, Nicholls EE, Young J, Hay EM, Foster NE. Exercise and physical activity in  
4 422 older adults with knee pain: a mixed methods study. *Rheumatology (Oxford)* 2015;54(3):413-  
5 423 23.
- 6  
7 424 (38) O'Connor SR, Tully MA, Ryan B, Bleakley CM, Baxter GD, Bradley JM, et al. Walking  
8 425 exercise for chronic musculoskeletal pain: systematic review and meta-analysis. *Arch Phys*  
9 426 *Med Rehabil* 2015;96(4):724-34.e3.
- 10  
11 427 (39) Hendry M, Williams NH, Markland D, Wilkinson C, Maddison P. Why should we  
12 428 exercise when our knees hurt? A qualitative study of primary care patients with osteoarthritis  
13 429 of the knee. *Fam Pract* 2006;23(5):558-67.
- 14  
15 430 (40) Bossen D, Veenhof C, Dekker J, de Bakker D. The usability and preliminary  
16 431 effectiveness of a web-based physical activity intervention in patients with knee and/or hip  
17 432 osteoarthritis. *BMC Med Inform Decis Mak* 2013;13(1):1-8.
- 18  
19 433 (41) Deranian CA, Desai P, Smith-Ray R, Seymour RB, Hughes SL. Perceived versus  
20 434 actual factors associated with adoption and maintenance of an evidence-based physical  
21 435 activity program. *Transl Behav Med* 2012;2(2):209-17.
- 22  
23 436 (42) Holden MA, Nicholls EE, Hay EM, Foster NE. Physical therapists' use of therapeutic  
24 437 exercise for patients with clinical knee osteoarthritis in the United Kingdom: in line with  
25 438 current recommendations? *Phys Ther* 2008;88(10):1109-21.
- 26  
27 439 (43) Bedson J, Mottram S, Thomas E, Peat G. Knee pain and osteoarthritis in the general  
28 440 population: what influences patients to consult? *Fam Pract* 2007;24(5):443-53.
- 29  
30 441 (44) Peabody JW, Luck J, Glassman P, Dresselhaus TR, Lee M. Comparison of vignettes,  
31 442 standardized patients, and chart abstraction: a prospective validation study of 3 methods for  
32 443 measuring quality. *JAMA* 2000;283(13):1715-22.
- 33  
34 444 (45) Norcini J. Back to the future: clinical vignettes and the measurement of physician  
35 445 performance. *Ann Intern Med* 2004;141(10):813-4.
- 36  
37 446 (46) Veloski J, Tai S, Evans AS, Nash DB. Clinical vignette-based surveys: a tool for  
38 447 assessing physician practice variation. *Am J Med Qual* 2005;20(3):151-7.
- 39  
40 448 (47) Peabody JW, Liu A. A cross-national comparison of the quality of clinical care using  
41 449 vignettes. *Health Policy Plan* 2007;22(5):294-302.
- 42  
43 450 (48) Conner M, Norman P. Predicting and changing health behaviour: research and practice  
44 451 with social cognition models. 3rd Ed. ed. Maidenhead: Open University Press; 2015.
- 45  
46 452 (49) Khan KM, Weiler R, Blair SN. Prescribing exercise in primary care: ten practical steps  
47 453 on how to do it. *BMJ* 2011;343:806-7.
- 48  
49 454 (50) Peterson JA. Get moving! Physical activity counseling in primary care. *J Am Acad*  
50 455 *Nurse Pract* 2007;19(7):349-57.
- 51  
52 456 (51) Grandes G, Sanchez A, Sanchez-Pinilla RO, Torcal J, Montoya I, Lizarraga K, et al.  
53 457 Effectiveness of physical activity advice and prescription by physicians in routine primary  
54 458 care: a cluster randomized trial. *Arch Intern Med* 2009;169(7):694-701.

- 1  
2  
3 459 (52) Professional Associations for Physical Activity (Sweden). Physical activity in the  
4 460 prevention and treatment of disease. Sweden: Swedish National Institute of Public Health;  
5 461 2010.
- 6  
7 462 (53) Patel A, Schofield GM, Kolt GS, Keogh JW. General practitioners' views and  
8 463 experiences of counselling for physical activity through the New Zealand Green Prescription  
9 464 program. *BMC Fam Pract* 2011;12:119.
- 10  
11 465 (54) Morden A, Jinks C, Ong BN, Porcheret M, Dziedzic KS. Acceptability of a 'guidebook'  
12 466 for the management of Osteoarthritis: a qualitative study of patient and clinician's  
13 467 perspectives. *BMC Musculoskelet Disord* 2014;15:427.
- 14  
15 468 (55) Keele University, Arthritis Research UK, National Institute for Health Research. A guide  
16 469 for people who have osteoarthritis. 2014; Available at:  
17 470 [http://www.keele.ac.uk/media/keeleuniversity/ri/primarycare/pdfs/OA\\_Guidebook.pdf](http://www.keele.ac.uk/media/keeleuniversity/ri/primarycare/pdfs/OA_Guidebook.pdf).  
18 471 Accessed July/03, 2015.
- 19  
20 472 (56) Arthritis Research UK. Osteoarthritis of the knee. Chesterfield. Available at:  
21 473 [http://www.arthritisresearchuk.org/arthritis-information/conditions/osteoarthritis-of-the-](http://www.arthritisresearchuk.org/arthritis-information/conditions/osteoarthritis-of-the-knee.aspx)  
22 474 [knee.aspx](http://www.arthritisresearchuk.org/arthritis-information/conditions/osteoarthritis-of-the-knee.aspx); Arthritis Research UK; 2013.
- 23  
24 475 (57) Gore M, Tai KS, Sadosky A, Leslie D, Stacey BR. Use and costs of prescription  
25 476 medications and alternative treatments in patients with osteoarthritis and chronic low back  
26 477 pain in community-based settings. *Pain Pract* 2012;12(7):550-60.
- 27  
28 478 (58) Brand CA, Harrison C, Tropea J, Hinman RS, Britt H, Bennell K. Management of  
29 479 osteoarthritis in general practice in Australia. *Arthritis Care Res (Hoboken)* 2014;66(4):551-8.
- 30  
31 480 (59) Wilkie R, Blagojevic-Bucknall M, Jordan KP, Lacey R, McBeth J. Reasons why  
32 481 multimorbidity increases the risk of participation restriction in older adults with lower  
33 482 extremity osteoarthritis: a prospective cohort study in primary care. *Arthritis Care Res*  
34 483 *(Hoboken)* 2013;65(6):910-9.
- 35  
36 484 (60) Goodwin N, Curry N, Naylor C, Ross S, Duldig W. Managing people with long-term  
37 485 conditions. The Kings Fund 2010:98.
- 38  
39 486 (61) Hay EM, Foster NE, Thomas E, Peat G, Phelan M, Yates HE, et al. Effectiveness of  
40 487 community physiotherapy and enhanced pharmacy review for knee pain in people aged over  
41 488 55 presenting to primary care: pragmatic randomised trial. *BMJ* 2006 Nov 11;333(7576):995.
- 42  
43 489 (62) Hurley MV, Walsh NE, Mitchell HL, Pimm TJ, Patel A, Williamson E, et al. Clinical  
44 490 effectiveness of a rehabilitation program integrating exercise, self-management, and active  
45 491 coping strategies for chronic knee pain: a cluster randomized trial. *Arthritis Rheum*  
46 492 2007;57(7):1211-9.
- 47  
48 493 (63) Dziedzic KS, Healey EL, Porcheret M, Ong BN, Main CJ, Jordan KP, et al.  
49 494 Implementing the NICE osteoarthritis guidelines: a mixed methods study and cluster  
50 495 randomised trial of a model osteoarthritis consultation in primary care--the Management of  
51 496 OsteoArthritis In Consultations (MOSAICS) study protocol. *Implement Sci* 2014;9(1):95.
- 52  
53 497 (64) Bury TJ, Stokes EK. Direct access and patient/client self-referral to physiotherapy: a  
54 498 review of contemporary practice within the European Union. *Physiotherapy* 2013;99(4):285-  
55 499 91.
- 56  
57  
58  
59  
60



1  
2  
3 500 (65) NHS England. Technology Enabled Care Services (TECS). Launch of technology  
4 501 enabled care services (TECS) resource for commissioners. Available at:  
5 502 <https://www.england.nhs.uk/ourwork/qual-clin-lead/tecs/>. Accessed April/05, 2016.

6  
7 503 (66) Rawstorn JC, Gant N, Direito A, Beckmann C, Maddison R. Telehealth exercise-based  
8 504 cardiac rehabilitation: a systematic review and meta-analysis. *Heart* 2016 Mar 2.

9  
10 505 (67) Hoaas H, Andreassen HK, Lien LA, Hjalmsen A, Zanaboni P. Adherence and factors  
11 506 affecting satisfaction in long-term telerehabilitation for patients with chronic obstructive  
12 507 pulmonary disease: a mixed methods study. *BMC Med Inform Decis Mak* 2016 Feb  
13 508 25;16(1):26-016-0264-9.

14  
15 509 **FIGURES**

16  
17  
18 510 Figure 1 Flow-chart summarising the exercise types and initiation methods used by GPs' for  
19  
20 511 the vignette patient with CKP

21  
22  
23 512 Figure 2 Barriers to using exercise reported by GPs  
24  
25  
26  
27  
28  
29  
30  
31  
32  
33  
34  
35  
36  
37  
38  
39  
40  
41  
42  
43  
44  
45  
46  
47  
48  
49  
50  
51  
52  
53  
54  
55  
56  
57  
58  
59  
60

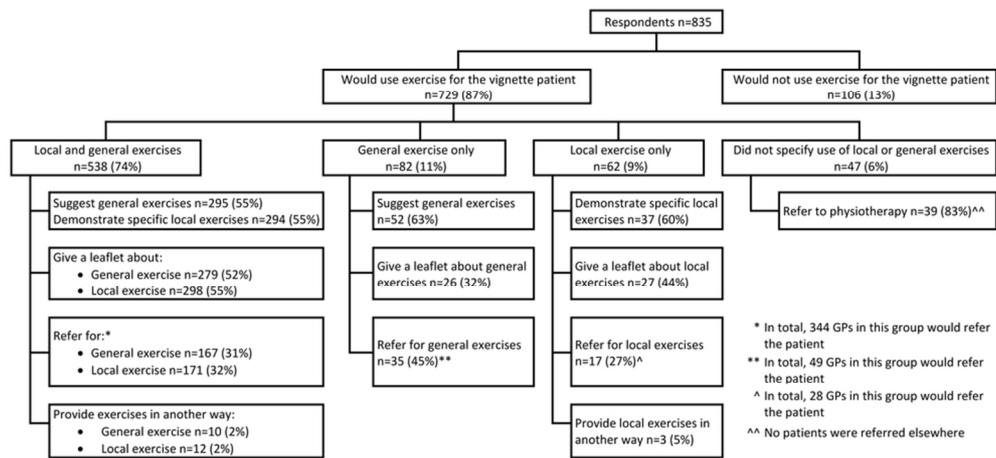

Figure 1 Flow-chart summarising the exercise types and initiation methods used by GPs' for the vignette patient with CKP

Figure 1

84x40mm (300 x 300 DPI)

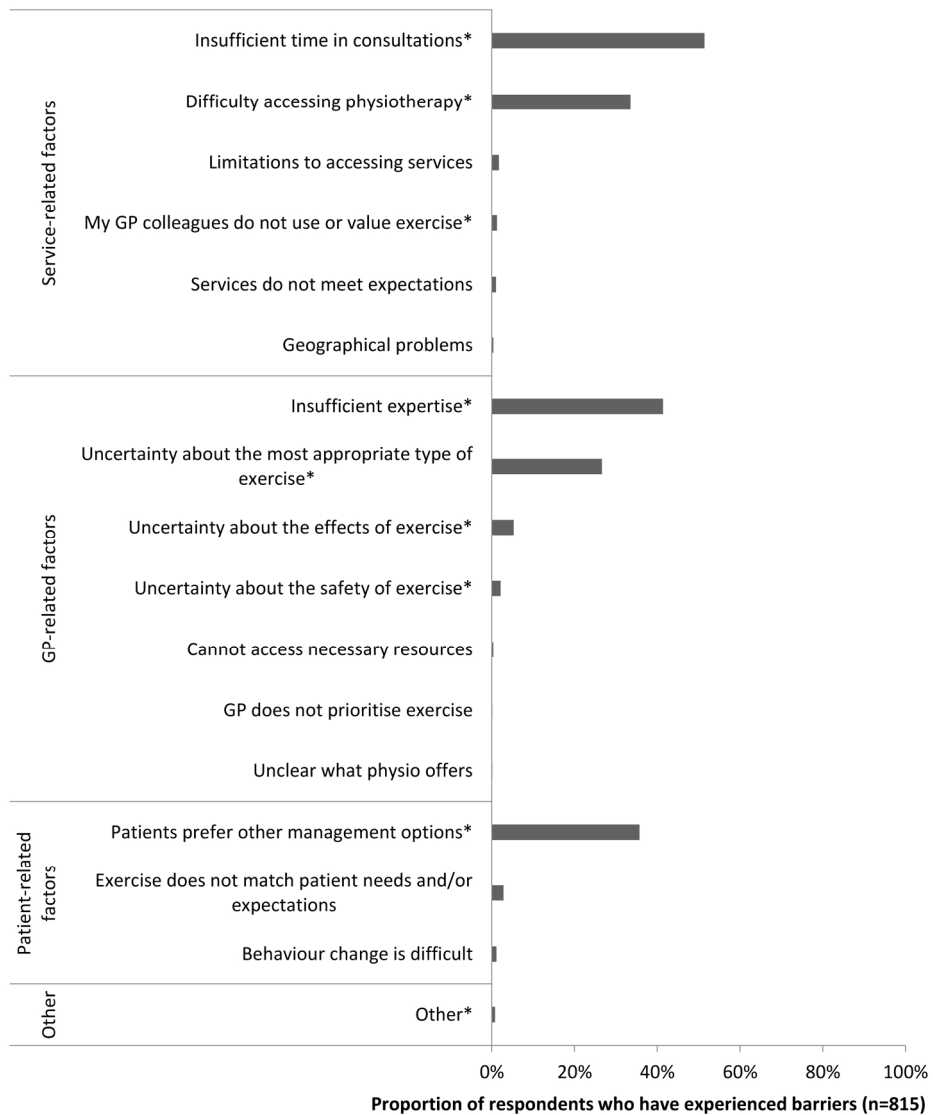

Responses were not mutually exclusive

Figure 2 Barriers to using exercise reported by GPs [asterisks denote barriers provided as a multiple response option in the questionnaire]

Figure 2  
169x209mm (300 x 300 DPI)

## Management of Chronic Knee Pain Study

We are seeking the views of general practitioners who treat patients over 45 years old, with chronic knee pain.

If you **are not** a general practitioner, please tick this box and return the questionnaire without completing it any further

If you **have not** managed someone with chronic knee pain in the last 6 months, please tick this box and return the questionnaire without completing it any further.

This questionnaire should take no more than **20 minutes** to complete.

Return of your completed questionnaire will be interpreted as you providing your consent to participate in this study.

If you would like to participate in this study please either:

- Complete this paper version of the questionnaire and return it to Dr Elizabeth Cottrell, Academic Clinical Fellow GP Specialty Trainee, at the Arthritis Research UK Primary Care Centre, Keele University, Staffordshire, ST5 5BG using the enclosed FREEPOST envelope.  
OR
- Complete the online version of this questionnaire accessible at [https://www.surveymonkey.com/s/Management\\_CKP](https://www.surveymonkey.com/s/Management_CKP)

If you have any questions about this questionnaire or the study in general you can email Dr Elizabeth Cottrell at [e.cottrell@keele.ac.uk](mailto:e.cottrell@keele.ac.uk)

### Instructions for completing this questionnaire

- When completing the questionnaire, please try and provide answers that most accurately reflect your usual clinical practice. There are no 'correct' or 'incorrect' answers.
- Where relevant please answer questions by ticking a box e.g.
- Please do not consult any literature while completing this questionnaire.

**Thank you for your help with this study**

|                     |                      |
|---------------------|----------------------|
| Unique<br>survey ID | <input type="text"/> |
|---------------------|----------------------|

## Section 1: About you

1.1 Please state the year in which you qualified as a General Practitioner

1.2 How many General Practitioners work in your practice (including yourself)?

1.3 How do you best **describe yourself** (please tick **one box** only)

- GP Partner       Salaried GP       Locum GP  
 Other, please specify

1.4 Is your practice  Urban       Semi-rural       Rural

1.5 Are you  Male       Female

1.6 Are you a **GP with a special interest (GPwSI)** in musculoskeletal conditions?

- Yes       No

1.7 Do you remember receiving any specific postgraduate musculoskeletal training which contained education about chronic knee pain? (By this we do not mean clinical placements or jobs in rheumatology or orthopaedics)

- Yes       No

1.8 Do you have, or have you ever suffered from chronic knee pain **yourself**?

- Yes       No

## Section 2: Clinical scenario of a patient with chronic knee pain

Presented below is a clinical scenario of a patient **with chronic knee pain** who presents to you with this problem for the first time. All questions that follow relate to the care you would give this particular patient. Think about the patient's first consultation with you.

**Patient:** Mrs Jones, 58-year-old Prison Officer

**History:** First presentation of gradually worsening bilateral knee pain (right worse than left) over 2 years  
 No history of trauma  
 Pain always present when walking and at rest, worst when climbing stairs. No night pain.  
 Managing activities of daily living. Difficulty gardening.  
 Stopped going to gym – thinks was making pain worse  
 Only treatment tried is Ibuprofen once or twice when pain "really bad" – no benefit.  
 Came today finding work increasingly difficult due to the stairs  
 Usually well – no comorbidities

**Medication:** Nil

**Examination:** Body Mass Index 33  
 Knees – bilaterally no effusions. Joint tenderness upon palpation. Bilateral coarse crepitations.  
 Slightly reduced flexion of the right knee.  
 Hips – no abnormality detected

2.1 What **diagnosis** would you make at this point?

---

2.2 Using the words you would use with the patient, **briefly** state how you would **describe your diagnosis** to the patient

---



---



---

2.3 The patient's **symptoms** are: (please tick the **one** box that best reflects your opinion)

Very severe     Severe     Moderate     Mild     Very mild

2.4 It is most likely that this patient's symptoms result from **knee damage** that is: (please tick the **one** box that best reflects your opinion)

Very severe     Severe     Moderate     Mild     Very mild

2.5 Using the words you would use with the patient, **briefly** describe **what the future is likely to hold** with regards to her knee problem

---



---

2.6 What **investigation(s)/assessment(s)** would you do/order for this patient **at this point** and for what reason?

| Please tick <b>all</b> you would undertake             | Please indicate the reason for choosing this investigation (tick all that apply) |                           |                          |                          |                          |                          |
|--------------------------------------------------------|----------------------------------------------------------------------------------|---------------------------|--------------------------|--------------------------|--------------------------|--------------------------|
|                                                        | Reassure patient                                                                 | To meet referral criteria | Confirm diagnosis        | Inform treatment         | Rule out other diagnoses | Inform prognosis         |
| <input type="checkbox"/> None                          | ---                                                                              | ---                       | ---                      | ---                      | ---                      | ---                      |
| <input type="checkbox"/> Blood tests                   | <input type="checkbox"/>                                                         | <input type="checkbox"/>  | <input type="checkbox"/> | <input type="checkbox"/> | <input type="checkbox"/> | <input type="checkbox"/> |
| <input type="checkbox"/> Oxford knee score             | <input type="checkbox"/>                                                         | <input type="checkbox"/>  | <input type="checkbox"/> | <input type="checkbox"/> | <input type="checkbox"/> | <input type="checkbox"/> |
| <input type="checkbox"/> Knee x-ray                    | <input type="checkbox"/>                                                         | <input type="checkbox"/>  | <input type="checkbox"/> | <input type="checkbox"/> | <input type="checkbox"/> | <input type="checkbox"/> |
| <input type="checkbox"/> Other - please state<br>_____ | <input type="checkbox"/>                                                         | <input type="checkbox"/>  | <input type="checkbox"/> | <input type="checkbox"/> | <input type="checkbox"/> | <input type="checkbox"/> |

2.7 **At this consultation**, what approaches would you use, or suggest, to manage this patient? (please tick **all** that apply)

- |                                                        |                                                                      |                                                                     |                                                                   |
|--------------------------------------------------------|----------------------------------------------------------------------|---------------------------------------------------------------------|-------------------------------------------------------------------|
| <input type="checkbox"/> Ice                           | <input type="checkbox"/> Keep active                                 | <input type="checkbox"/> Weak opioids (e.g. codeine)                | <input type="checkbox"/> Topical NSAID                            |
| <input type="checkbox"/> Heat                          | <input type="checkbox"/> Provision of walking stick(s)               | <input type="checkbox"/> COX II inhibitor                           | <input type="checkbox"/> Paracetamol                              |
| <input type="checkbox"/> Acupuncture                   | <input type="checkbox"/> Advice on footwear                          | <input type="checkbox"/> Antidepressants                            | <input type="checkbox"/> Glucosamine/chondroitin                  |
| <input type="checkbox"/> Rest                          | <input type="checkbox"/> Exercise                                    | <input type="checkbox"/> Injection of steroids                      | <input type="checkbox"/> Topical capsaicin                        |
| <input type="checkbox"/> Weight loss                   | <input type="checkbox"/> Bed rest                                    | <input type="checkbox"/> Oral non-selective NSAIDs (e.g. Ibuprofen) | <input type="checkbox"/> Strong opioids (e.g. morphine, Tramadol) |
| <input type="checkbox"/> None                          | <input type="checkbox"/> Transcutaneous electrical nerve stimulation |                                                                     |                                                                   |
| <input type="checkbox"/> Other (please state)<br>_____ |                                                                      |                                                                     |                                                                   |

**If you ticked "Exercise" in question 2.7 please go on to answer question 2.8. If not, please move straight on to question 2.9**

2.8 There are a variety of approaches that can be used to manage chronic knee pain in general practice.

Of the following different approaches, **which, if any, would you use for this patient at this point?**

a) General exercises or increasing physical activity

I would use  If you **would use** this strategy, please give details about what you would **actually do** (please tick any that apply)

Suggest general exercises  Please state type of exercise \_\_\_\_\_

Give a leaflet \_\_\_\_\_

Refer \_\_\_\_\_

Other  Please state what other actions you would do \_\_\_\_\_

I would **not** use  If you **would not use** the strategy **but would like to**, please tell us **what prevents** you (please tick any that apply)

Insufficient expertise  Insufficient time

Other  Please state what other reasons prevent you (e.g. patient factors, access difficulties, uncertainty of benefit etc) \_\_\_\_\_

b) Local knee or quadriceps strengthening exercises

I would use  If you **would use** this strategy, please give details about what you would **actually do** (please tick any that apply)

Demonstrate specific exercises

Give a leaflet \_\_\_\_\_

Refer \_\_\_\_\_

Other  Please state what other actions you would do \_\_\_\_\_

I would **not** use  If you **would not use** the strategy **but would like to**, please tell us **what prevents** you (please tick any that apply)

Insufficient expertise  Insufficient time

Other  Please state what other reasons prevent you (e.g. patient factors, access difficulties, uncertainty of benefit etc) \_\_\_\_\_

c) Follow up patient to check to see if she is undertaking exercise on a regular basis

I would use  If you **would use** this strategy, please give details about what you would **actually do** (please tick any that apply)

Planned follow-up  When Please define number of days/weeks/months \_\_\_\_\_

How  Face to face  Via telephone

With whom  Yourself  Another professional or service – please state \_\_\_\_\_

Opportunistic follow-up  When  If patient fails to improve  Check when patient is next seen with this or any problem

Other  Please state what other actions you would do \_\_\_\_\_

I would **not** use  If you **would not use** the strategy **but would like to**, please tell us **what prevents** you (please tick any that apply)

Insufficient expertise  Insufficient time

Other  Please state what other reasons prevent you \_\_\_\_\_

2.9 Would you refer the patient to see someone else, either in the primary or community team or into secondary care, at this point?  Yes  No

If yes, to whom would you refer her?

2.10 Do you usually provide **written information** for patients in this situation?  Yes  No

If yes, please state the source of your written information

Patient.co.uk or Emis Mentor  Arthritis Research UK (previously known as ARC) or Arthritis Care  Other, please state \_\_\_\_\_

If you would provide written information, it would be very helpful to see a copy by returning it in the freepost envelope provided (**please write on your unique survey ID**) or by providing us with the link for any online information you access.

We are interested in your clinical opinion about patients **aged 45 years and over** with **chronic knee pain**. In this age group chronic knee pain is almost always due to knee osteoarthritis. Please answer all of the following questions using the definition of chronic knee pain as follows: knee pain and associated symptoms that have been present for more than 3 months not resulting from a fracture, infection, systemic rheumatological problem, metastases or surgery.

### Section 3: Chronic knee pain in general practice

|                                                                                                                                                                         | I have never heard about or read it | I have heard of it but not seen it | I have seen it but not read it | I have read the full guideline and/or summary | I have read and consider the guideline when planning management |
|-------------------------------------------------------------------------------------------------------------------------------------------------------------------------|-------------------------------------|------------------------------------|--------------------------------|-----------------------------------------------|-----------------------------------------------------------------|
| 3.1 How much have you heard about or read the guideline published by NICE in 2008 for the care and management of osteoarthritis in adults? (please tick <b>one</b> box) | <input type="checkbox"/>            | <input type="checkbox"/>           | <input type="checkbox"/>       | <input type="checkbox"/>                      | <input type="checkbox"/>                                        |

Please consider **your role** in managing patients aged over 45 years old with chronic knee pain. Please indicate the extent to which you agree or disagree with the statements given by ticking **one** box per row.

|                                                                                                    | Strongly disagree        | Disagree                 | Neither agree or disagree | Agree                    | Strongly agree           |
|----------------------------------------------------------------------------------------------------|--------------------------|--------------------------|---------------------------|--------------------------|--------------------------|
| 3.2 It is part of my job to manage people with chronic knee pain                                   | <input type="checkbox"/> | <input type="checkbox"/> | <input type="checkbox"/>  | <input type="checkbox"/> | <input type="checkbox"/> |
| 3.3 I have enough time to manage patients with chronic knee pain                                   | <input type="checkbox"/> | <input type="checkbox"/> | <input type="checkbox"/>  | <input type="checkbox"/> | <input type="checkbox"/> |
| 3.4 Managing patients with chronic knee pain is a priority for me                                  | <input type="checkbox"/> | <input type="checkbox"/> | <input type="checkbox"/>  | <input type="checkbox"/> | <input type="checkbox"/> |
| 3.5 Managing patients with chronic knee pain is of clinical interest to me                         | <input type="checkbox"/> | <input type="checkbox"/> | <input type="checkbox"/>  | <input type="checkbox"/> | <input type="checkbox"/> |
| 3.6 It is part of my job to reassure patients about the safety of exercise for chronic knee pain   | <input type="checkbox"/> | <input type="checkbox"/> | <input type="checkbox"/>  | <input type="checkbox"/> | <input type="checkbox"/> |
| 3.7 It is part of my job to provide patients with chronic knee pain with a written management plan | <input type="checkbox"/> | <input type="checkbox"/> | <input type="checkbox"/>  | <input type="checkbox"/> | <input type="checkbox"/> |



|                                                                                                                                                                                                                           | I have no role in including exercise in the management                       | I inform patients that exercise is a management option                           | I advise patients to use exercise to manage their knee pain        | I recommend the types of exercise patients could use | I give information on the type, frequency and duration of specific exercises |
|---------------------------------------------------------------------------------------------------------------------------------------------------------------------------------------------------------------------------|------------------------------------------------------------------------------|----------------------------------------------------------------------------------|--------------------------------------------------------------------|------------------------------------------------------|------------------------------------------------------------------------------|
| 3.8 Which statement best describes your role in including exercise in the management plan of a patient with chronic knee pain? (please tick <b>one</b> box)                                                               | <input type="checkbox"/>                                                     | <input type="checkbox"/>                                                         | <input type="checkbox"/>                                           | <input type="checkbox"/>                             | <input type="checkbox"/>                                                     |
| 3.9 We are interested to hear about <b>your experiences of barriers which might prevent the use of exercise</b> in your management of chronic knee pain. Please tick <b>all</b> of the barriers that you have experienced |                                                                              |                                                                                  |                                                                    |                                                      |                                                                              |
| <input type="checkbox"/> Insufficient time in consultations                                                                                                                                                               | <input type="checkbox"/> Insufficient expertise to give detailed information | <input type="checkbox"/> Difficulty accessing physiotherapy                      | <input type="checkbox"/> Uncertainty about the effects of exercise |                                                      |                                                                              |
| <input type="checkbox"/> Patients prefer other management options                                                                                                                                                         | <input type="checkbox"/> My GP colleagues do not use or value exercise       | <input type="checkbox"/> Uncertainty about the most appropriate type of exercise | <input type="checkbox"/> Uncertainty about the safety of exercise  |                                                      |                                                                              |
| <input type="checkbox"/> Other (please state)                                                                                                                                                                             | _____                                                                        |                                                                                  |                                                                    |                                                      |                                                                              |
|                                                                                                                                                                                                                           | _____                                                                        |                                                                                  |                                                                    |                                                      |                                                                              |

### Section 4: Your views about chronic knee pain

Below is a list of **possible causes** for a patient developing chronic knee pain. Please indicate the extent to which you agree or disagree with these causes by ticking **one** box in each row.

|                                                                        | Strongly disagree        | Disagree                 | Neither agree or disagree | Agree                    | Strongly agree           |
|------------------------------------------------------------------------|--------------------------|--------------------------|---------------------------|--------------------------|--------------------------|
| 4.1 Hereditary/runs in the family                                      | <input type="checkbox"/> | <input type="checkbox"/> | <input type="checkbox"/>  | <input type="checkbox"/> | <input type="checkbox"/> |
| 4.2 Being overweight/obese                                             | <input type="checkbox"/> | <input type="checkbox"/> | <input type="checkbox"/>  | <input type="checkbox"/> | <input type="checkbox"/> |
| 4.3 A person's own mental attitude e.g. thinking about life negatively | <input type="checkbox"/> | <input type="checkbox"/> | <input type="checkbox"/>  | <input type="checkbox"/> | <input type="checkbox"/> |
| 4.4 A person's emotional state e.g. feeling down, anxious              | <input type="checkbox"/> | <input type="checkbox"/> | <input type="checkbox"/>  | <input type="checkbox"/> | <input type="checkbox"/> |
| 4.5 Ageing                                                             | <input type="checkbox"/> | <input type="checkbox"/> | <input type="checkbox"/>  | <input type="checkbox"/> | <input type="checkbox"/> |
| 4.6 Accident or injury                                                 | <input type="checkbox"/> | <input type="checkbox"/> | <input type="checkbox"/>  | <input type="checkbox"/> | <input type="checkbox"/> |
| 4.7 Manual work                                                        | <input type="checkbox"/> | <input type="checkbox"/> | <input type="checkbox"/>  | <input type="checkbox"/> | <input type="checkbox"/> |
| 4.8 Sport                                                              | <input type="checkbox"/> | <input type="checkbox"/> | <input type="checkbox"/>  | <input type="checkbox"/> | <input type="checkbox"/> |
| 4.9 Osteoarthritis                                                     | <input type="checkbox"/> | <input type="checkbox"/> | <input type="checkbox"/>  | <input type="checkbox"/> | <input type="checkbox"/> |
| 4.10 Changes consistent with osteoarthritis seen on x-ray              | <input type="checkbox"/> | <input type="checkbox"/> | <input type="checkbox"/>  | <input type="checkbox"/> | <input type="checkbox"/> |

When completing the following questions, please consider patients **aged over 45 years old** with **chronic knee pain**. Please indicate the extent to which you agree or disagree with the statements given by ticking one box per row.

|      |                                                                                                                              | Totally disagree         | Largely disagree         | Disagree to some extent  | Agree to some extent     | Largely agree            | Totally agree            |
|------|------------------------------------------------------------------------------------------------------------------------------|--------------------------|--------------------------|--------------------------|--------------------------|--------------------------|--------------------------|
| 4.11 | Mental stress can cause chronic knee pain even in the absence of tissue damage                                               | <input type="checkbox"/> | <input type="checkbox"/> | <input type="checkbox"/> | <input type="checkbox"/> | <input type="checkbox"/> | <input type="checkbox"/> |
| 4.12 | The cause of chronic knee pain is unknown                                                                                    | <input type="checkbox"/> | <input type="checkbox"/> | <input type="checkbox"/> | <input type="checkbox"/> | <input type="checkbox"/> | <input type="checkbox"/> |
| 4.13 | Pain is a nociceptive stimulus, indicating tissue damage                                                                     | <input type="checkbox"/> | <input type="checkbox"/> | <input type="checkbox"/> | <input type="checkbox"/> | <input type="checkbox"/> | <input type="checkbox"/> |
| 4.14 | A patient suffering from severe chronic knee pain will benefit from physical exercise                                        | <input type="checkbox"/> | <input type="checkbox"/> | <input type="checkbox"/> | <input type="checkbox"/> | <input type="checkbox"/> | <input type="checkbox"/> |
| 4.15 | Functional limitations associated with chronic knee pain are the result of psychosocial factors                              | <input type="checkbox"/> | <input type="checkbox"/> | <input type="checkbox"/> | <input type="checkbox"/> | <input type="checkbox"/> | <input type="checkbox"/> |
| 4.16 | Patients with chronic knee pain should preferably practice only pain free movements                                          | <input type="checkbox"/> | <input type="checkbox"/> | <input type="checkbox"/> | <input type="checkbox"/> | <input type="checkbox"/> | <input type="checkbox"/> |
| 4.17 | Therapy may have been successful even if pain remains                                                                        | <input type="checkbox"/> | <input type="checkbox"/> | <input type="checkbox"/> | <input type="checkbox"/> | <input type="checkbox"/> | <input type="checkbox"/> |
| 4.18 | Chronic knee pain indicates the presence of organic injury                                                                   | <input type="checkbox"/> | <input type="checkbox"/> | <input type="checkbox"/> | <input type="checkbox"/> | <input type="checkbox"/> | <input type="checkbox"/> |
| 4.19 | If chronic knee pain increases in severity, I immediately adjust the intensity of my treatment accordingly                   | <input type="checkbox"/> | <input type="checkbox"/> | <input type="checkbox"/> | <input type="checkbox"/> | <input type="checkbox"/> | <input type="checkbox"/> |
| 4.20 | If therapy does not result in a reduction in chronic knee pain, there is a high risk of severe restrictions in the long term | <input type="checkbox"/> | <input type="checkbox"/> | <input type="checkbox"/> | <input type="checkbox"/> | <input type="checkbox"/> | <input type="checkbox"/> |
| 4.21 | Pain reduction is a precondition for the restoration of normal functioning                                                   | <input type="checkbox"/> | <input type="checkbox"/> | <input type="checkbox"/> | <input type="checkbox"/> | <input type="checkbox"/> | <input type="checkbox"/> |
| 4.22 | Increased pain indicates new tissue damage or the spread of existing damage                                                  | <input type="checkbox"/> | <input type="checkbox"/> | <input type="checkbox"/> | <input type="checkbox"/> | <input type="checkbox"/> | <input type="checkbox"/> |
| 4.23 | There is no effective treatment to eliminate chronic knee pain                                                               | <input type="checkbox"/> | <input type="checkbox"/> | <input type="checkbox"/> | <input type="checkbox"/> | <input type="checkbox"/> | <input type="checkbox"/> |
| 4.24 | Even if the pain has worsened, the intensity of the next treatment can be increased                                          | <input type="checkbox"/> | <input type="checkbox"/> | <input type="checkbox"/> | <input type="checkbox"/> | <input type="checkbox"/> | <input type="checkbox"/> |
| 4.25 | If patients complain of pain during exercise, I worry that damage is being caused                                            | <input type="checkbox"/> | <input type="checkbox"/> | <input type="checkbox"/> | <input type="checkbox"/> | <input type="checkbox"/> | <input type="checkbox"/> |
| 4.26 | The severity of tissue damage determines the level of pain                                                                   | <input type="checkbox"/> | <input type="checkbox"/> | <input type="checkbox"/> | <input type="checkbox"/> | <input type="checkbox"/> | <input type="checkbox"/> |
| 4.27 | Learning to cope with stress promotes recovery from chronic knee pain                                                        | <input type="checkbox"/> | <input type="checkbox"/> | <input type="checkbox"/> | <input type="checkbox"/> | <input type="checkbox"/> | <input type="checkbox"/> |
| 4.28 | Exercises that may be knee straining should <u>not</u> be avoided                                                            | <input type="checkbox"/> | <input type="checkbox"/> | <input type="checkbox"/> | <input type="checkbox"/> | <input type="checkbox"/> | <input type="checkbox"/> |
| 4.29 | In the long run, patients with chronic knee pain have a higher risk of developing severe functional impairments              | <input type="checkbox"/> | <input type="checkbox"/> | <input type="checkbox"/> | <input type="checkbox"/> | <input type="checkbox"/> | <input type="checkbox"/> |

## Section 5: Your views about the role of exercise in treating chronic knee pain

We are interested in your views about the **role of exercise** in the treatment of **chronic knee pain in patients over 45 years old**. Please indicate the extent to which you agree or disagree with the statements given by ticking one box per row.

|      |                                                                                                                   | Strongly disagree        | Disagree                 | Neither agree or disagree | Agree                    | Strongly agree           |
|------|-------------------------------------------------------------------------------------------------------------------|--------------------------|--------------------------|---------------------------|--------------------------|--------------------------|
| 5.1  | GPs should prescribe quadriceps strengthening exercises to every patient with chronic knee pain                   | <input type="checkbox"/> | <input type="checkbox"/> | <input type="checkbox"/>  | <input type="checkbox"/> | <input type="checkbox"/> |
| 5.2  | GPs should prescribe general exercise, for example, walking or swimming, for every patient with chronic knee pain | <input type="checkbox"/> | <input type="checkbox"/> | <input type="checkbox"/>  | <input type="checkbox"/> | <input type="checkbox"/> |
| 5.3  | Knee problems are improved by quadriceps strengthening exercises                                                  | <input type="checkbox"/> | <input type="checkbox"/> | <input type="checkbox"/>  | <input type="checkbox"/> | <input type="checkbox"/> |
| 5.4  | Knee problems are improved by general exercise, for example walking or swimming                                   | <input type="checkbox"/> | <input type="checkbox"/> | <input type="checkbox"/>  | <input type="checkbox"/> | <input type="checkbox"/> |
| 5.5  | Quadriceps strengthening exercises for the knee are safe for everybody to do                                      | <input type="checkbox"/> | <input type="checkbox"/> | <input type="checkbox"/>  | <input type="checkbox"/> | <input type="checkbox"/> |
| 5.6  | General exercise, for example walking or swimming is safe for everybody to do                                     | <input type="checkbox"/> | <input type="checkbox"/> | <input type="checkbox"/>  | <input type="checkbox"/> | <input type="checkbox"/> |
| 5.7  | Exercise for chronic knee pain is most beneficial when it is tailored to meet individual patient needs            | <input type="checkbox"/> | <input type="checkbox"/> | <input type="checkbox"/>  | <input type="checkbox"/> | <input type="checkbox"/> |
| 5.8  | A standard set of exercises is sufficient for every patient with chronic knee problems                            | <input type="checkbox"/> | <input type="checkbox"/> | <input type="checkbox"/>  | <input type="checkbox"/> | <input type="checkbox"/> |
| 5.9  | GPs should educate chronic knee pain patients about how to change their lifestyle for the better                  | <input type="checkbox"/> | <input type="checkbox"/> | <input type="checkbox"/>  | <input type="checkbox"/> | <input type="checkbox"/> |
| 5.10 | It is important that people with chronic knee pain increase their overall activity levels                         | <input type="checkbox"/> | <input type="checkbox"/> | <input type="checkbox"/>  | <input type="checkbox"/> | <input type="checkbox"/> |
| 5.11 | How well a patient complies with their exercise programme determines how effective it will be                     | <input type="checkbox"/> | <input type="checkbox"/> | <input type="checkbox"/>  | <input type="checkbox"/> | <input type="checkbox"/> |
| 5.12 | GPs should follow up patients to monitor extent of continuation of exercises                                      | <input type="checkbox"/> | <input type="checkbox"/> | <input type="checkbox"/>  | <input type="checkbox"/> | <input type="checkbox"/> |
| 5.13 | It is the patient's own responsibility to continue doing their exercise programme                                 | <input type="checkbox"/> | <input type="checkbox"/> | <input type="checkbox"/>  | <input type="checkbox"/> | <input type="checkbox"/> |
| 5.14 | Exercise is effective for patients if an x-ray shows severe knee osteoarthritis                                   | <input type="checkbox"/> | <input type="checkbox"/> | <input type="checkbox"/>  | <input type="checkbox"/> | <input type="checkbox"/> |
| 5.15 | Exercise works just as well for everybody, regardless of the amount of pain they have                             | <input type="checkbox"/> | <input type="checkbox"/> | <input type="checkbox"/>  | <input type="checkbox"/> | <input type="checkbox"/> |
| 5.16 | Increasing the strength of the muscles around the knee stops the knee problem getting worse                       | <input type="checkbox"/> | <input type="checkbox"/> | <input type="checkbox"/>  | <input type="checkbox"/> | <input type="checkbox"/> |
| 5.17 | Increasing overall activity levels stops the knee problem getting worse                                           | <input type="checkbox"/> | <input type="checkbox"/> | <input type="checkbox"/>  | <input type="checkbox"/> | <input type="checkbox"/> |
| 5.18 | Exercise for chronic knee pain is more effectively provided by physiotherapists than GPs                          | <input type="checkbox"/> | <input type="checkbox"/> | <input type="checkbox"/>  | <input type="checkbox"/> | <input type="checkbox"/> |
| 5.19 | Time constraints prevent GPs from providing advice on individual exercises for chronic knee pain                  | <input type="checkbox"/> | <input type="checkbox"/> | <input type="checkbox"/>  | <input type="checkbox"/> | <input type="checkbox"/> |
| 5.20 | Exercise for chronic knee pain should preferably be used after drug treatment has been tried                      | <input type="checkbox"/> | <input type="checkbox"/> | <input type="checkbox"/>  | <input type="checkbox"/> | <input type="checkbox"/> |
| 5.21 | Exercise for chronic knee pain would be used more frequently if access to physiotherapy was easier                | <input type="checkbox"/> | <input type="checkbox"/> | <input type="checkbox"/>  | <input type="checkbox"/> | <input type="checkbox"/> |

1 **Would you be happy for us to contact you again in the future regarding this study?**

2

3 Yes

4

5 No

6  
7 **If you answered YES to the question above please provide your name and contact details**  
8 **below (these details will be kept separately from your responses to the questionnaire):**  
9

|                                     |  |
|-------------------------------------|--|
| 10 <b>Name:</b>                     |  |
| 11                                  |  |
| 12                                  |  |
| 13 <b>Daytime telephone number:</b> |  |
| 14                                  |  |
| 15                                  |  |
| 16 <b>Address:</b>                  |  |
| 17                                  |  |
| 18                                  |  |
| 19                                  |  |
| 20                                  |  |
| 21                                  |  |
| 22                                  |  |
| 23                                  |  |
| 24                                  |  |
| 25                                  |  |
| 26 <b>Email:</b>                    |  |
| 27                                  |  |
| 28                                  |  |
| 29                                  |  |

30  
31 **End of Questionnaire**

32  
33 You have reached the end of the questionnaire. Please return the questionnaire in the  
34 **FREEPOST** envelope provided.

35  
36 If you have any questions about this questionnaire or the study in general, you can email  
37 Dr Elizabeth Cottrell at [e.cottrell@keele.ac.uk](mailto:e.cottrell@keele.ac.uk)  
38

39  
40 **Thank you for taking the time to complete this questionnaire. Your**  
41 **time and participation is greatly appreciated.**  
42  
43  
44  
45  
46  
47  
48  
49  
50  
51  
52  
53  
54  
55  
56  
57

58 Unique survey ID  
59  
60

# BMJ Open

## GP attitudes, beliefs and behaviours regarding exercise for chronic knee pain: a questionnaire survey

|                                 |                                                                                                                                                                                                                                                                                                                                                                                                                                                                                                                                                                                                                                                                                                                                                        |
|---------------------------------|--------------------------------------------------------------------------------------------------------------------------------------------------------------------------------------------------------------------------------------------------------------------------------------------------------------------------------------------------------------------------------------------------------------------------------------------------------------------------------------------------------------------------------------------------------------------------------------------------------------------------------------------------------------------------------------------------------------------------------------------------------|
| Journal:                        | <i>BMJ Open</i>                                                                                                                                                                                                                                                                                                                                                                                                                                                                                                                                                                                                                                                                                                                                        |
| Manuscript ID                   | bmjopen-2016-014999.R1                                                                                                                                                                                                                                                                                                                                                                                                                                                                                                                                                                                                                                                                                                                                 |
| Article Type:                   | Research                                                                                                                                                                                                                                                                                                                                                                                                                                                                                                                                                                                                                                                                                                                                               |
| Date Submitted by the Author:   | 22-Mar-2017                                                                                                                                                                                                                                                                                                                                                                                                                                                                                                                                                                                                                                                                                                                                            |
| Complete List of Authors:       | Cottrell, Elizabeth ; Keele University, Research Institute for Primary Care & Health Sciences<br>Foster, Nadine; Keele University, Arthritis Research UK Primary Care Centre, Research Institute of Primary Care and Health Sciences; Keele University, Keele Clinical Trials Unit<br>Porcheret, Mark; Keele University, Arthritis Research UK Primary Care Centre, Research Institute of Primary Care and Health Sciences<br>Rathod, Trishna; Keele University, Arthritis Research UK Primary Care Centre, Research Institute of Primary Care and Health Sciences; Keele University, Keele Clinical Trials Unit<br>Roddy, Edward; Keele University, Arthritis Research UK Primary Care Centre, Research Institute of Primary Care and Health Sciences |
| <b>Primary Subject Heading</b>: | General practice / Family practice                                                                                                                                                                                                                                                                                                                                                                                                                                                                                                                                                                                                                                                                                                                     |
| Secondary Subject Heading:      | Evidence based practice, Rheumatology                                                                                                                                                                                                                                                                                                                                                                                                                                                                                                                                                                                                                                                                                                                  |
| Keywords:                       | Knee < ORTHOPAEDIC & TRAUMA SURGERY, osteoarthritis, exercise, general practitioners, surveys and questionnaires, attitude                                                                                                                                                                                                                                                                                                                                                                                                                                                                                                                                                                                                                             |
|                                 |                                                                                                                                                                                                                                                                                                                                                                                                                                                                                                                                                                                                                                                                                                                                                        |

SCHOLARONE™  
Manuscripts

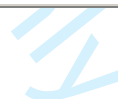

1  
2  
3 1 **GP attitudes, beliefs and behaviours regarding exercise for chronic**  
4  
5 2 **knee pain: a questionnaire survey**  
6  
7

8 3 Elizabeth Cottrell MBChB(Hons), MRCP, Ph.D.\*<sup>^</sup>, Nadine E. Foster BSc(Hons), DPhil,  
9 4 FCSP\*<sup>†</sup>, Mark Porcheret MBBS, FRCGP, Ph.D.\*<sup>†</sup>, Trishna Rathod MSc\*<sup>†</sup>, Edward Roddy  
10 5 DM, FRCP\*  
11  
12

13  
14  
15 6 \*Arthritis Research UK Primary Care Centre, Research Institute for Primary Care and Health  
16 7 Sciences, Keele University, UK  
17

18  
19  
20 8 <sup>†</sup>Keele Clinical Trials Unit, David Weatherall Building, Keele University, Staffordshire, ST5  
21

22 9 5BG<sup>^</sup>Corresponding author: Arthritis Research UK Primary Care Centre, Research Institute  
23 10 for Primary Care and Health Sciences, Keele University, Keele, Staffordshire, ST5 5BG.  
24

25  
26 11 Telephone: 01782 734870. Fax: 01782 734719. Email: [e.cottrell@keele.ac.uk](mailto:e.cottrell@keele.ac.uk)  
27

28  
29 12 **KEY WORDS**  
30

31 13 Chronic knee pain, osteoarthritis, exercise, general practitioners, surveys and  
32 14 questionnaires, attitude  
33

34  
35  
36 15 **Word count** excluding title page, abstract, references, tables and figures: 2862  
37

38  
39 16 Number of tables and figures: Figures 2, Tables 4  
40  
41

42 17  
43  
44  
45  
46  
47  
48  
49  
50  
51  
52  
53  
54  
55  
56  
57  
58  
59  
60

1  
2  
3 18 **ABSTRACT**  
4

5  
6 19 **Objectives:**  
7

8  
9 20 The aim of this study was to investigate general practitioners' (GPs) attitudes, beliefs and  
10  
11 21 behaviours regarding the use of exercise for patients with chronic knee pain (CKP)  
12  
13 22 attributable to osteoarthritis.  
14

15  
16 23 **Setting:**  
17

18  
19 24 Primary care GPs in the UK.  
20

21  
22 25 **Participants:**  
23

24  
25 26 5000 GPs, randomly selected from Binley's database, were mailed a cross-sectional  
26  
27 27 questionnaire survey.  
28

29  
30 28 **Outcome measures:**  
31

32  
33 29 GPs' attitudes and beliefs were investigated using attitude statements, and reported  
34  
35 30 behaviours were identified using vignette-based questions. GPs were invited to report  
36  
37 31 barriers experienced when initiating exercise with patients with CKP.  
38

39  
40 32 **Results:**  
41

42  
43 33 835 (17%) GPs responded. Overall, GPs were positive about general exercise for CKP. 729  
44  
45 34 (87%) reported using exercise, of which, 538 (74%) reported that they would use both  
46  
47 35 general and local (lower limb) exercises. However, only 92 (11% of all responding) GPs  
48  
49 36 reported initiating exercise in ways aligning with best-evidence recommendations. 815 (98%)  
50  
51 37 GPs reported barriers in using exercise for patients with CKP, most commonly, insufficient  
52  
53 38 time in consultations (n=419; 51%) and insufficient expertise (n=337; 41%).  
54

55  
56 39 **Conclusions:**  
57  
58  
59  
60

1  
2  
3 40 While GPs' attitudes and beliefs regarding exercise for CKP were generally positive,  
4  
5 41 initiation of exercise was often poorly aligned with current recommendations, and barriers  
6  
7 42 and uncertainties were reported. GPs' use of exercise may be improved by addressing the  
8  
9 43 key barriers of time and expertise, by developing a pragmatic approach that supports GPs to  
10  
11 44 initiate individualised exercise, and/or by other professionals taking on this role.  
12  
13  
14

### STRENGTHS AND LIMITATIONS OF THIS STUDY

- This large UK survey is the first known to directly, specifically and concurrently investigate the attitudes, beliefs and behaviours of GPs regarding exercise for patients with CKP. Exercise initiation did not concur with best-evidence recommendations and GPs reported uncertainties and barriers in relation to using exercise.
- The questionnaire was pre-tested and piloted before being used in this main study. Use of a vignette to investigate clinical management ensured a consistent patient scenario to all GPs and minimised the confounders inherent in observational research using real patients.
- Limitations of this study include the likely over-estimation of exercise use among GPs given the low response rate (response bias), the self-report nature of the questionnaire (social desirability bias), inability to explore underlying reasons for responses and the relatively uncomplicated vignette case. However, as GPs should be using exercise for all patients with CKP, the results of this survey are valuable for indicating an apparent evidence-practice gap in the way in which GPs employ exercise with this patient group.

15  
16  
17  
18  
19  
20  
21  
22  
23  
24  
25  
26  
27  
28  
29  
30  
31  
32  
33  
34  
35  
36  
37  
38  
39  
40  
41  
42  
43  
44  
45  
46  
47  
48  
49  
50  
51  
52  
53  
54  
55 45  
56  
57  
58  
59  
60



1  
2  
3 46 **ABBREVIATIONS**  
4

5  
6 47 CI = confidence interval; CKP = chronic knee pain; EULAR = European League Against  
7  
8 48 Rheumatism; GP = general practitioners; HCP = healthcare professional; MDS = minimum  
9  
10 49 data set; NICE = National Institute for Health and Care Excellence; OA = osteoarthritis;  
11  
12 50 OARSI = Osteoarthritis Research Society International; OR = odds ratio; UK = United  
13  
14 51 Kingdom  
15  
16  
17  
18  
19  
20  
21  
22  
23  
24  
25  
26  
27  
28  
29  
30  
31  
32  
33  
34  
35  
36  
37  
38  
39  
40  
41  
42  
43  
44  
45  
46  
47  
48  
49  
50  
51  
52  
53  
54  
55  
56  
57  
58  
59  
60

## 52 INTRODUCTION

53 General practitioners (GPs) are the most frequently accessed source of formal medical  
54 advice and treatment for patients in the UK with chronic knee pain (CKP).[1-3] CKP is  
55 defined in this study as being synonymous with clinical knee osteoarthritis (OA),[4] that is;  
56 mechanical knee pain, with or without loss of function, and with or without radiographic  
57 changes consistent with OA, that has lasted for at least three months in people aged 45  
58 years and older,[5] and for which an alternative diagnosis is unlikely.[4] Globally, OA is  
59 among the leading causes of years lived with disability,[6] thus it is unsurprising that CKP is  
60 a common presentation to GPs.[7,8] Exercise, comprising of both local (lower limb focused)  
61 and general (aerobic) exercise, is recommended as core treatment for CKP,[4,9] its  
62 provision is one of the eight UK OA quality standards[10] and international OA experts  
63 recognise provision of information about regular physical activity and individualised exercise  
64 to patients as essential.[11] Empirical research evidence now unequivocally demonstrates  
65 that general aerobic, local strengthening and flexibility exercises improve pain and function  
66 in patients with CKP.[12] In line with wider self-management strategies, best practice  
67 outlined by the National Institute for Health and Care Excellence (NICE) OA guidelines with  
68 regards to integrating exercise into the management of patients with CKP involves providing  
69 verbal advice about both general and local exercise (which should be specific and  
70 individualised[4,13]) supported with written information.[4] Where GPs feel unable to provide  
71 specific and individualised advice, referral of patients to appropriate exercise specialists (e.g.  
72 physiotherapist) would be appropriate. While it is recognised that delivery of care for CKP is  
73 multidisciplinary, the exact roles and explicit expectations of GPs (and other professionals)  
74 regarding the delivery of core management approaches is not provided within current  
75 guidelines. This could have the consequence that no professional undertakes certain  
76 activities in the belief that others will.

77 To maximise patient outcomes, GPs should align their management with best-evidence  
78 recommendations. As sociocognitive behavioural theories suggest an association between

1  
2  
3 79 individuals' attitudes and beliefs and their behaviours,[14-16] concurrent investigation of  
4 80 attitudes, beliefs and behaviours of GPs was undertaken. A systematic review revealed a  
5 81 paucity of data specifically examining GPs use of exercise for patients with CKP, however  
6 82 attitudes regarding exercise were variable, it appeared to be underused and its  
7 83 implementation by GPs was unclear.[5] The role that GPs perceive themselves to have in  
8 84 delivering these management approaches was also not clear. The aim of this cross-sectional  
9 85 questionnaire survey was to identify the attitudes, beliefs and behaviours of UK GPs  
10 86 regarding the use of exercise for patients with CKP. Analysis of factors associated with the  
11 87 use of exercise among this group have been published elsewhere.[17]

## 21 88 **METHODS**

22 89 A cross-sectional survey was used to investigate GPs attitudes, beliefs and behaviours  
23 90 regarding exercise for CKP. The survey tool had previously been developed through pre-  
24 91 testing by a local group of GPs and a subsequent pilot study with 172 UK GPs,[18] which  
25 92 was designed to investigate the likely response to the questionnaire, to finalise the survey  
26 93 tool and to test methods to maximise quantity and quality of responses.

27 94 In this main study, GPs were mailed an eight-page questionnaire (see Supplementary File  
28 95 1), a cover letter and a postage-paid reply envelope in January 2014. Non-responders were  
29 96 sent a reminder postcard after two weeks and, four weeks after the initial mailing, persistent  
30 97 non-responders were mailed a second copy of the questionnaire with a cover letter and  
31 98 postage-paid reply envelope. At each stage non-responders who did not wish to complete  
32 99 the full questionnaire were invited to provide minimum data sets (MDS; gender, year of  
33 100 qualification, practice size and setting) and a reason for non-response. Attitude statements  
34 101 associated with a five-point Likert scale explored GPs' attitudes and beliefs about exercise  
35 102 for CKP. These were minimally adapted from the work of Holden and colleagues who  
36 103 investigated this among physiotherapists[19] and older adults with CKP[20] and were  
37 104 derived from the MOVE consensus recommendations, designed to help healthcare

105 professionals (HCPs) to initiate exercise in the management of a patient with lower limb  
 106 OA[21]. GPs' reported clinical behaviour was investigated using multiple response questions  
 107 associated with a vignette case (see Table 1). GPs reporting to use exercise were requested  
 108 to indicate the type of exercise and how this was initiated. A multiple response item, with  
 109 space for free-text, investigated GPs' experiences of barriers to using exercise for CKP.  
 110 Completion and return of the questionnaire by the GP was interpreted as consent to  
 111 participate in the study.

112 **Table 1 Vignette used in the questionnaire to assess GPs' reported behaviours**

|                     |                                                                                                                                                                                                                                                                                                                                                                                                                                                                                                                                            |
|---------------------|--------------------------------------------------------------------------------------------------------------------------------------------------------------------------------------------------------------------------------------------------------------------------------------------------------------------------------------------------------------------------------------------------------------------------------------------------------------------------------------------------------------------------------------------|
| <b>Patient:</b>     | Mrs Jones, 58-year-old Prison Officer                                                                                                                                                                                                                                                                                                                                                                                                                                                                                                      |
| <b>History:</b>     | First presentation of gradually worsening bilateral knee pain (right worse than left) over 2 years<br>No history of trauma<br>Pain always present when walking and at rest, worst when climbing stairs. No night pain.<br>Managing activities of daily living. Difficulty gardening.<br>Stopped going to gym – thinks was making pain worse<br>Only treatment tried is ibuprofen once or twice when pain “really bad” – no benefit.<br>Came today finding work increasingly difficult due to the stairs<br>Usually well – no comorbidities |
| <b>Medication:</b>  | Nil                                                                                                                                                                                                                                                                                                                                                                                                                                                                                                                                        |
| <b>Examination:</b> | Body Mass Index 33<br>Knees – bilaterally no effusions. Joint tenderness upon palpation. Bilateral coarse crepitations.<br>Slightly reduced flexion of the right knee.<br>Hips – no abnormality detected                                                                                                                                                                                                                                                                                                                                   |

113 A minimum sample size of 288 responding GPs was required to estimate the use of  
 114 exercise, based on a conservative estimate of 75% reporting exercise use informed by the  
 115 pilot study[18] and a margin of error of <5%.[22] After increasing the minimum sample size  
 116 to adjust for other planned regression analyses (exploring associations between reported  
 117 exercise use and attitudes/beliefs (paper in preparation)) and anticipating a response rate of  
 118 20%,[18] 5000 UK GPs were randomly selected from Binley's database; a database  
 119 containing the contact details of GPs in the UK which is updated quarterly. Binley's extracted  
 120 a simple random sample of GPs from their database and removed and replaced any GPs  
 121 included in the sample used for the previous pilot study. Study exclusion criteria were not  
 122 being a GP and not having managed someone with CKP in the previous six months.

1  
2  
3 123 GPs' practice postcodes from each UK country were transformed into their corresponding  
4  
5 124 Index of Multiple Deprivation rank[23-26] and split into quintiles (1=most deprived, 5=least  
6  
7 125 deprived). Responses to the GP attitude statements were condensed into three categories  
8  
9 126 ((strongly) disagree, neither disagree nor agree, and (strongly) agree) and free-text  
10  
11 127 responses (associated "other" responses and regarding type of exercise the GPs would use)  
12  
13 128 underwent thematic analysis, categorising responses into pre-defined categories that  
14  
15 129 emerged from responses to the pilot study and developing new categories as appropriate,  
16  
17 130 before commencing descriptive analyses. Responses to GP attitude statements were  
18  
19 131 interpreted as follows: unanimity = 100%, consensus = 75-99%, majority view = 51-74%, no  
20  
21 132 consensus = 0-50%[19,27]. To assess for possible response bias in questionnaire  
22  
23 133 respondents versus MDS responders, demographic data of each type of responders were  
24  
25 134 compared using logistic regression to obtain unadjusted odds ratio with 95% confidence  
26  
27 135 interval (CI; gender, practice area deprivation and practice type) and mean difference with  
28  
29 136 95% CI (mean years since qualification and mean number of GPs in respondents practice).  
30  
31 137 An *a posteriori* analysis was undertaken due to the timing of the main survey coinciding with  
32  
33 138 publication of the revised version of the NICE OA guidelines on 12<sup>th</sup> February 2014 (four  
34  
35 139 weeks after the baseline mailing of the survey). To establish whether the publication of these  
36  
37 140 guidelines, and the publicity associated with this event had an impact on the proportion of  
38  
39 141 GPs using exercise, logistic regression was used to compare the use of exercise among  
40  
41 142 responses received before the date of publication of the revised guideline with those  
42  
43 143 responses received after. All analyses were performed using IBM SPSS Statistics (Version  
44  
45 144 20).

## 145 **RESULTS**

### 146 **Response**

147 Of the 5000 GPs sent the questionnaire, 58 responders met one or more exclusion criteria  
148 and 835 returned a completed questionnaire (adjusted response 17%). A further 470

149 provided MDS. The most common reason for returning MDS, rather than a full response  
 150 was, having insufficient time (n=408, 87%). The characteristics of GPs responding with a  
 151 MDS were similar to those responding with a full questionnaire, except they had been  
 152 qualified for longer and were more likely to work in practices in the most deprived areas  
 153 (Table 2). When compared to GPs with practice postcodes in the mid-deprived quintile  
 154 (OR (95% CI)), those in the most deprived (0.72 (0.60,0.87)) and second most deprived  
 155 (0.76 (0.62,0.92)) were significantly less likely to respond in any way (completed  
 156 questionnaire or MDS), although the absolute difference in the proportions responding  
 157 were small.

158 **Table 2 Demographic details of questionnaire respondents versus those providing minimum**  
 159 **data sets**

| Variable                                                                                                                                                                                 | Category              | Response type |                                 | OR/mean difference (95% CI)                  |
|------------------------------------------------------------------------------------------------------------------------------------------------------------------------------------------|-----------------------|---------------|---------------------------------|----------------------------------------------|
|                                                                                                                                                                                          |                       | MDS (n=470)   | Completed questionnaire (n=835) |                                              |
| <b>Gender</b>                                                                                                                                                                            | Male                  | 247 (53%)     | 401 (49%)                       | OR 1.00                                      |
|                                                                                                                                                                                          | Female                | 219 (47%)     | 417 (51%)                       | OR 1.17 (0.93,1.47)                          |
| <b>Practice area deprivation</b>                                                                                                                                                         | Most deprived         | 121 (26%)     | 181 (22%)                       | <b>OR 0.63 (0.45,0.89)</b>                   |
|                                                                                                                                                                                          | Second most deprived  | 106 (23%)     | 156 (19%)                       | <b>OR 0.62 (0.44,0.88)</b>                   |
|                                                                                                                                                                                          | Mid-deprived          | 85 (18%)      | 202 (24%)                       | OR 1.00                                      |
|                                                                                                                                                                                          | Second least deprived | 84 (18%)      | 160 (19%)                       | OR 0.80 (0.56,1.16)                          |
|                                                                                                                                                                                          | Least deprived        | 73 (16%)      | 135 (16%)                       | OR 0.78 (0.53,1.14)                          |
| <b>Practice type</b>                                                                                                                                                                     | Urban                 | 254 (56%)     | 449 (54%)                       | OR 1.00                                      |
|                                                                                                                                                                                          | Semi-rural            | 155 (34%)     | 275 (33%)                       | OR 1.00 (0.78,1.29)                          |
|                                                                                                                                                                                          | Rural                 | 43 (10%)      | 103 (13%)                       | OR 1.36 (0.92,2.00)                          |
| <b>Mean (SD) years since qualification</b>                                                                                                                                               |                       | 21.64 (10.03) | 18.40 (10.33)                   | Mean difference = <b>-3.24 (-2.06,-4.42)</b> |
| <b>Mean (SD) number of GPs in respondent's practice</b>                                                                                                                                  |                       | 6.44 (3.67)   | 6.44 (3.20)                     | Mean difference = <0.01 (-0.38,0.39)         |
| <b>Information only requested in questionnaire</b>                                                                                                                                       |                       |               |                                 |                                              |
| <b>Type of GP</b>                                                                                                                                                                        | GP partner            | ---           | 656 (79%)                       | ---                                          |
|                                                                                                                                                                                          | Salaried GP           | ---           | 151 (18%)                       | ---                                          |
|                                                                                                                                                                                          | Locum GP              | ---           | 20 (2%)                         | ---                                          |
|                                                                                                                                                                                          | Other                 | ---           | 5 (1%)                          | ---                                          |
| <b>GP with special interest in musculoskeletal conditions</b>                                                                                                                            |                       | ---           | 50 (6%)                         | ---                                          |
| <b>Received postgraduate education about CKP</b>                                                                                                                                         |                       | ---           | 319 (39%)                       | ---                                          |
| <b>Personal experience of CKP</b>                                                                                                                                                        |                       | ---           | 166 (20%)                       | ---                                          |
| Maximum missing data for any cell was 6%. CI = confidence interval; CKP = chronic knee pain, GP = general practitioner; MDS = minimum data set; OR = odds ratio; SD = standard deviation |                       |               |                                 |                                              |

160

1  
2  
3 161 **Attitudes of GPs regarding exercise for CKP**  
4

5 162 Table 3 summarises responses to GP exercise attitude statements, none were unanimous.  
6  
7 163 Generally, GPs were more positive about general exercise than local exercise, particularly  
8  
9 164 with regards to safety and efficacy. However, more GPs agreed that increasing the strength  
10  
11 165 of the muscles around the knee stops the knee problem getting worse compared with those  
12  
13 166 who agreed that increasing overall physical activity would do the same. No consensus was  
14  
15 167 reached regarding the statement '*exercise works just as well for everybody, regardless of*  
16  
17 168 *the amount of pain they have*', however the greatest proportion of respondents disagreed.  
18  
19 169 GPs recognised the need to tailor exercises to individual patients, acknowledged the  
20  
21 170 importance of adherence with exercise but placed responsibility for adherence on the  
22  
23 171 patient.  
24  
25  
26  
27  
28  
29  
30  
31  
32  
33  
34  
35  
36  
37  
38  
39  
40  
41  
42  
43  
44  
45  
46  
47  
48  
49  
50  
51  
52  
53  
54  
55  
56  
57  
58  
59  
60

172 Table 3 Responses to GP attitude statements derived from the MOVE consensus recommendations [21]

| MOVE consensus proposition                                                                                                                                                   | Attitude statement                                                                                          | (Strongly disagree) | Neither disagree or agree | (Strongly agree) |
|------------------------------------------------------------------------------------------------------------------------------------------------------------------------------|-------------------------------------------------------------------------------------------------------------|---------------------|---------------------------|------------------|
| <b>Items relating to the benefits of exercise (number of respondents)</b>                                                                                                    |                                                                                                             |                     |                           |                  |
| Prescription of both general (aerobic fitness training) and local (strengthening) exercises is an essential, core aspect of management for every patient with hip or knee OA | GPs should prescribe quadriceps strengthening exercises to every patient with CKP (n=822)                   | 8%                  | 22%                       | 69%              |
|                                                                                                                                                                              | GPs should prescribe general exercise, for example, walking or swimming, for every patient with CKP (n=824) | 3%                  | 8%                        | 89%              |
| Both strengthening and aerobic exercise can reduce pain and improve function and health status in patients with knee and hip OA                                              | Knee problems are improved by quadriceps strengthening exercises (n=824)                                    | <1%                 | 11%                       | 88%              |
|                                                                                                                                                                              | Knee problems are improved by general exercise, for example, walking or swimming (n=824)                    | 1%                  | 7%                        | 93%              |
| There are few contraindications to the prescription of strengthening or aerobic exercise in patients with hip or knee OA                                                     | Quadriceps strengthening exercises for the knee are safe for everybody to do (n=821)                        | 15%                 | 30%                       | 56%              |
|                                                                                                                                                                              | General exercise, for example, walking or swimming, is safe for everybody to do (n=820)                     | 13%                 | 16%                       | 71%              |
|                                                                                                                                                                              | Exercise works just as well for everybody, regardless of the amount of pain they have (n=823)               | 49%                 | 29%                       | 22%              |
| The effectiveness of exercise is independent of the presence or severity of radiographic findings                                                                            | Exercise is effective for patients if an x-ray shows severe knee osteoarthritis (n=822)                     | 16%                 | 32%                       | 52%              |
| Improvements in muscle strength and proprioception gained from exercise programmes may reduce the progression of knee and hip OA                                             | Increasing the strength of the muscles around the knee stops the knee problem getting worse (n=824)         | 16%                 | 29%                       | 55%              |
|                                                                                                                                                                              | Increasing the overall activity levels stops the knee problem getting worse (n=822)                         | 19%                 | 38%                       | 43%              |
| <b>Items relating to the delivery of, and adherence to, exercise (number of respondents)</b>                                                                                 |                                                                                                             |                     |                           |                  |
| Exercise therapy for OA of the hip or knee should be individualised and patient-centred taking into account factors such as age, comorbidity and overall mobility            | Exercise for CKP is most beneficial when it is tailored to meet individual patient needs (n=823)            | 1%                  | 9%                        | 90%              |
|                                                                                                                                                                              | A standard set of exercises is sufficient for every patient with chronic knee problems (n=821)              | 51%                 | 36%                       | 13%              |
| <b>To be effective, exercise programmes should include...advice and education to promote a positive lifestyle change with an increase in physical activity</b>               | GPs should educate CKP patients about how to change their lifestyle for the better (n=823)                  | 1%                  | 6%                        | 93%              |
|                                                                                                                                                                              | It is important that people with CKP increase their overall activity levels (n=824)                         | 1%                  | 10%                       | 89%              |



|                                                                                                                                                                                                                                      |                                                                                                       |     |     |     |
|--------------------------------------------------------------------------------------------------------------------------------------------------------------------------------------------------------------------------------------|-------------------------------------------------------------------------------------------------------|-----|-----|-----|
| Adherence is the principal predictor of long-term outcome from exercise in patients with knee or hip OA                                                                                                                              | How well a patient complies with their exercise programme determines how effective it will be (n=825) | 3%  | 11% | 86% |
| Strategies to improve and maintain adherence should be adopted, e.g. long-term monitoring/review and inclusion of spouse/family in exercise                                                                                          | GPs should follow-up patients to monitor extent of continuation of exercises (n=823)                  | 30% | 37% | 34% |
|                                                                                                                                                                                                                                      | It is the patient's own responsibility to continue doing their exercise programme (n=826)             | 1%  | 6%  | 93% |
| <b>Consensus categorised according to: unanimity = 100%, consensus = 75-99%, majority view = 51-74%, no consensus = 0-50% (19,27). CKP = chronic knee pain; GP = general practitioner. Maximum missing data for any item was 2%.</b> |                                                                                                       |     |     |     |

1  
2  
3  
4 173 **GPs' reported use of exercise for CKP**  
5

6 174 Of the 835 respondents, 729 (87%) reported using exercise of some type for the vignette  
7  
8 175 case. Figure 1 summarises the types of exercise and initiation methods that GPs reported  
9  
10 176 that they would use. Among GPs reporting to suggest general exercise (n=347), the most  
11  
12 177 common recommendations were swimming (49%), walking (41%) and cycling (34%). Only  
13  
14 178 17 (5%) GPs explicitly stated that general exercise should be tailored to patient's abilities  
15  
16 179 and/or interests. Among GPs reporting to use exercise, 413 (57%) stated they would achieve  
17  
18 180 this by referring the patient to a physiotherapist. Table 4 cross-tabulates the exercise  
19  
20 181 initiation strategies GPs reported to use for both general and local exercise and shows the  
21  
22 182 most common combinations of approaches were *suggesting* general exercise and  
23  
24 183 *demonstrating* local exercise, and giving the patient a leaflet about both exercise types.  
25  
26 184 Thirty-two (6%) GPs reporting to use both exercise types stated they would achieve this  
27  
28 185 solely by referring the patient to another HCP. Ninety-two GPs (17% of those using both  
29  
30 186 local and general exercise, 11% of all respondents) reported to use strategies aligned with  
31  
32 187 evidence-based recommendations;<sup>[4]</sup> they advised, or referred for, local and general  
33  
34 188 exercise and provided written information for both exercise types (Table 4). The use of  
35  
36 189 exercise was not significantly different among responses received after the publication of  
37  
38 190 the revised NICE OA guidelines (273/314, 87%) when compared with those received  
39  
40 191 before (456/521, 88%; OR 0.95 (95% CI 0.62,1.44)).  
41  
42

43 192 **[INSERT Figure 1 Flow-chart summarising the exercise types and initiation methods used by**  
44  
45 193 **GPs' for the vignette patient with CKP]**  
46

47 194  
48  
49

50 195  
51

52 196  
53  
54

55 197  
56  
57  
58  
59  
60

198 **Table 4 Methods used to initiate local and general exercise by GPs using both exercise types**

| <b>Methods used to include general exercises</b> | <b>Methods used to include local exercises</b>      |                                   |                     |                                               |
|--------------------------------------------------|-----------------------------------------------------|-----------------------------------|---------------------|-----------------------------------------------|
|                                                  | <i>Does not demonstrate, give leaflet nor refer</i> | <i>Refers and/or demonstrates</i> | <i>Leaflet only</i> | <i>Leaflet and demonstrates, and/or refer</i> |
| <i>Does not suggest, give leaflet nor refer</i>  | 0%                                                  | 1%                                | 0%                  | <1%                                           |
| <i>Refers and/or suggests only</i>               | <1%                                                 | 33%                               | 6%                  | 7%                                            |
| <i>Leaflet only</i>                              | 0%                                                  | 4%                                | 11%                 | 7%                                            |
| <i>Leaflet, suggests and/or refers</i>           | <1%                                                 | 6%                                | 6%                  | 17%                                           |

Management strategies used by >5% GPs are emboldened. The responses in the box are those that are consistent with evidence-based recommendations (i.e. providing advice and written information about both types of exercise and/or referring if needed). n=535

199 **Use of follow-up**

200 Of the 729 GPs reporting to use of exercise, 494 (68%) stated that they would follow-up the  
 201 vignette patient to establish ongoing engagement with regular exercise. This was most  
 202 commonly achieved through opportunistic follow-up (n=303, 61%) which most GPs (n=253,  
 203 84%) suggested would occur if the vignette patient failed to improve and re-consulted.

204 **Barriers to exercise use**

205 Most GPs (n=815, 98%) reported having experienced barriers when using exercises for  
 206 patients with CKP which included: 1) service-related, 2) GP-related and 3) (perceived)  
 207 patient-related barriers (Figure 2). The most frequently reported barriers were insufficient  
 208 time (n=419, 51%), insufficient expertise (n=337, 41%) and the perception that patients  
 209 prefer other management options (n=291, 36%).

210 **[INSERT Figure 2 Barriers to using exercise reported by GPs]**

211 **DISCUSSION**212 **Summary**

213 This cross-sectional questionnaire survey sought to identify the attitudes, beliefs and  
 214 behaviours of UK GPs regarding the use of exercise for patients with CKP. While most GPs

1  
2  
3 215 agreed that they should *'prescribe'* local and general exercise to all patients with CKP,  
4  
5 216 believed that CKP is improved by local and general exercise, and reported that they would  
6  
7 217 use exercise in the management of the vignette patient, only a tenth of responding GPs  
8  
9 218 reported initiating exercise in a way that matches best-evidence recommendations.[4] This  
10  
11 219 evidence-practice gap is perhaps unsurprising given that most GPs reported key barriers of  
12  
13 220 time and expertise. A small number of GPs reported relying solely on referring the vignette  
14  
15 221 patient to another HCP for both exercise types. This approach delays commencement of  
16  
17 222 exercise as patients are not equipped to start exercising immediately after the consultation  
18  
19 223 with the GP, relies on the receiving HCP delivering best practice and may not represent  
20  
21 224 efficient use of services, if this is representative of GPs' usual approach for patients with  
22  
23 225 CKP.

#### 226 **Comparison with existing literature**

227 Variable GP attitudes regarding exercise for CKP were recognised in an earlier systematic  
228 review[5] and the uncertainty regarding exercise efficacy identified by the current study  
229 supports this. GPs' responses to the MOVE attitude statements from the current study were  
230 compared to those from physiotherapists[19] and older adults with CKP.[20] In contrast to  
231 GPs being generally more positive regarding general exercise when compared to local  
232 exercise, physiotherapists were generally more positive about the safety and efficacy of local  
233 exercise,[19] and older adults with CKP reported low levels of agreement about the safety  
234 and efficacy of both types of exercise.[20] Although GPs were more positive about the  
235 efficacy and safety of both exercise types than either physiotherapists or those with CKP, the  
236 timing of the respective surveys must be considered. In the time between the previous and  
237 current surveys, new and/or revised versions of NICE,[4] Osteoarthritis Research Society  
238 International (OARSI)[9] and European League Against Rheumatism (EULAR)[28] guideline  
239 recommendations for OA have been published; thus familiarity with best-evidence  
240 recommendations may have increased.

1  
2  
3 241 GPs' reported behaviour was consistent with higher estimates from other physician  
4  
5 242 questionnaire studies; between 9-89% of GPs advising exercise[5,29-31] and 10-77%  
6  
7 243 referring patients with CKP to physiotherapy[5,29-31]. Given that estimates of GPs' exercise  
8  
9 244 use are similar internationally, for example, advice to exercise was 46-76% in the UK[32,33]  
10  
11 245 and 12-59% in the USA[31,34-37], the results are likely to be relevant beyond the UK. While  
12  
13 246 the most common general exercise suggestions (swimming, walking and cycling) were  
14  
15 247 clinically appropriate, the extent to which this advice would be translated into action may be  
16  
17 248 questionable from previous literature. Walking is acceptable to patients[38] and it improves  
18  
19 249 function [39], whilst it is also low impact, easily accessible,[39] adaptable to patient  
20  
21 250 preferences and easy to incorporate into everyday life. However, it is unclear how  
22  
23 251 acceptable or realistic it is for patients with CKP to engage in cycling or swimming.[40,41]  
24  
25 252 For example, having to pay (e.g. for equipment or instructors) is a recognised barrier to  
26  
27 253 physical activity engagement.[13,42] Combining the findings of uncertain appropriateness of  
28  
29 254 (some) suggested modes of exercise with only 5% of GPs using general exercise explicitly  
30  
31 255 stating that their advice should be tailored to their patients' interests and abilities, suggests a  
32  
33 256 need for greater focus on individualising exercise. As many GPs reported having insufficient  
34  
35 257 time and expertise to use exercise, referral to other HCPs may be appropriate. However  
36  
37 258 physiotherapists report similar uncertainties about the safety and efficacy of exercise[19] and  
38  
39 259 suboptimal use of both exercise types, favouring local more than general exercise  
40  
41 260 approaches.[43] Further, it is unlikely to be an economically viable approach for GPs to  
42  
43 261 manage all patients with CKP by referring them to physiotherapists. It is possible therefore,  
44  
45 262 that solely relying on physiotherapists to deliver exercise interventions may not ensure all  
46  
47 263 patients receive tailored, specific instruction on both exercise types. Finally, a third of  
48  
49 264 respondents reported that they would opportunistically follow-up the vignette patient to check  
50  
51 265 adherence to exercise. However, previous research examining the consultation behaviour of  
52  
53 266 patients with CKP has shown that while many patients may consult again with other health  
54  
55 267 problems, CKP is often not recorded again.[44] Thus the GPs' reported intentions regarding  
56  
57 268 follow-up are likely to be unrealistically optimistic.

1  
2  
3 269 **Strengths and limitations**  
4

5 270 This large UK survey is the first known to directly, specifically and concurrently investigate  
6  
7 271 the attitudes, beliefs and behaviours of GPs regarding exercise for patients with CKP. The  
8  
9 272 questionnaire was pre-tested and piloted before being used in this main study. Employing a  
10  
11 273 vignette provided a consistent patient scenario to all GPs[45-48] and minimised the  
12  
13 274 confounders inherent in observational research investigating clinical management using real  
14  
15 275 patients.[46,47] Limitations of this study include the likely over-estimation of exercise use  
16  
17 276 among GPs given the low response rate (response bias), the self-report nature of the  
18  
19 277 questionnaire (social desirability bias) and the relatively uncomplicated vignette case. Due to  
20  
21 278 the use of survey methodology, we could not explore the reasons underlying GPs  
22  
23 279 responses. However, as GPs should be using exercise for all patients with CKP, the results  
24  
25 280 of this survey are valuable for indicating an apparent evidence-practice gap in the way in  
26  
27 281 which GPs employ exercise with this patient group.  
28  
29

30 282 **Implications for future practice**  
31  
32

33 283 Implementation of current evidence-based recommendations for the management of CKP  
34  
35 284 needs to be improved among GPs in the UK. It is possible that at least part of the problem in  
36  
37 285 implementing the recommendations is the lack of explicit guidance regarding the role of  
38  
39 286 GPs, and other members of the multidisciplinary team who may be involved in, managing  
40  
41 287 patients with this condition. This is perhaps reflected by the variable perceptions among GPs  
42  
43 288 regarding their role in managing CKP and the extent to which they believe they should  
44  
45 289 provide exercise advice or prescription. However, given the apparent association between  
46  
47 290 perceived role and behaviour among the GPs who responded to the survey (reported  
48  
49 291 elsewhere [17]), greater clarity of roles and expectations of all professional groups would be  
50  
51 292 a good starting point for improving implementation of guidelines.  
52

53 293 To deliver best practice for patients with CKP, strategies which target both GPs and the  
54  
55 294 wider primary care team are needed. Two key areas should be addressed: i) development of  
56  
57  
58  
59  
60

1  
2  
3 295 a pragmatic approach for GPs to initiate individualised local and general exercise and ii)  
4  
5 296 identification of additional methods of initiating exercise and/or supporting patients to  
6  
7 297 continue with exercise that do not solely rely on GPs. Given that theoretical patient  
8  
9 298 behaviour change models[49] often involve a balance of perceived value and risks/burdens  
10  
11 299 of undertaking the new behaviour, a pragmatic approach for GPs initiating exercise among  
12  
13 300 patients with CKP would need to highlight the value of exercise to patients, its role relative to  
14  
15 301 other interventions and practical ways to undertake specific and individualised exercise.  
16  
17 302 Such a best practice approach was suggested by Khan et al[50] who recommended that  
18  
19 303 GPs should encourage the use of exercise (e.g. by asking about physical activity at each  
20  
21 304 consultation), consider the '5 A's' of physical activity counselling (assess, advise, agree,  
22  
23 305 assist and arrange),[51] write an exercise prescription,[52-54] and refer or signpost to  
24  
25 306 appropriate professionals or resources for exercise support and/or follow-up. Supplementary  
26  
27 307 written leaflets or 'guidebooks' seem to be acceptable and useful[55] and can be accessed  
28  
29 308 or signposted within consultations; for example, the Keele University OA guidebook[56] and  
30  
31 309 the Arthritis Research UK knee OA booklet.[57] Given that CKP patients commonly have  
32  
33 310 comorbidities[38,58,59] and multiple joint pain, GPs could use this opportunity to detect and  
34  
35 311 manage comorbid conditions that may directly impact the use of exercise (e.g.  
36  
37 312 cardiovascular disease, depression[60]), to relay the synergistic benefits of exercise for all  
38  
39 313 relevant morbidities, and to make explicit that CKP should not prevent exercise for other  
40  
41 314 conditions. Practical methods to help GPs provide the above information, in limited available  
42  
43 315 time, need to be developed and may include personalised written care plans.[61] Given that  
44  
45 316 time was the most frequently reported barrier to GPs initiating exercise, service delivery  
46  
47 317 models may need to change such that exercise initiation, support and/or follow-up is  
48  
49 318 primarily undertaken by other professionals such as physiotherapists,[62,63] practice  
50  
51 319 nurses,[64] health trainers or local gym personnel. Direct access may enhance patients'  
52  
53 320 utilisation of physiotherapists[65] and alternative, low GP burden, strategies could be  
54  
55 321 explored to promote exercise use and/or follow-up. For example, technology enabled care  
56  
57  
58  
59  
60

1  
2  
3 322 services[66] have shown promise when used to support exercise interventions among  
4  
5 323 patients with cardiac[67] and chronic lung disease.[68]  
6

## 7 324 **CONCLUSIONS**

8  
9  
10 325 Although the majority of UK GPs who responded to the questionnaire survey were positive  
11  
12 326 about exercise for patients with CKP and used exercise in their clinical management, this  
13  
14 327 survey identified GP uncertainties with respect to the safety and efficacy of exercise and  
15  
16 328 suboptimal approaches to the initiation of exercise with patients. GPs' use of exercise may  
17  
18 329 be improved by addressing the key barriers of time and expertise, by developing a pragmatic  
19  
20 330 approach that supports GPs to initiate individualised exercise with patients, and/or by other  
21  
22 331 professionals taking on this role.  
23

## 24 332 **ACKNOWLEDGEMENTS**

25  
26  
27  
28 333 This project was supported by Keele Clinical Trials Unit. We would also like to thank the staff  
29  
30 334 within the Research Institute for Primary Care and Health Sciences who supported the study  
31  
32 335 and the GPs who participated.  
33

## 34 336 **CONTRIBUTORSHIP STATEMENT**

35  
36  
37 337 EC, NF, MP, TR, and ER participated in the design of the study, analysis of the results and  
38  
39 338 helped to draft the manuscript. All authors read and approved the final manuscript.  
40

## 41 339 **COMPETING INTERESTS**

42  
43  
44  
45 340 The authors declare that they have no competing interests.  
46  
47

## 48 341 **DATA SHARING**

49  
50  
51 342 The datasets analysed during the current study available from the corresponding author on  
52  
53 343 reasonable request.  
54

## 55 344 **FUNDING**



1  
2  
3 345 This paper presents independent research funded by the Arthritis Research UK Centre in  
4  
5 346 Primary Care grant (Grant Number 20202). NF, an NIHR Senior Investigator, is supported  
6  
7 347 through an NIHR Research Professorship (NIHR-RP-011-015). EC was funded by an NIHR  
8  
9 348 Academic Clinical Fellowship and subsequently by the NIHR School for Primary Care  
10  
11 349 Research bridging funds. The views expressed in this publication are those of the authors  
12  
13 350 and not necessarily those of the NHS, the NIHR or the Department of Health.

## 15 351 **ETHICAL APPROVAL**

17  
18 352 Ethical approval for the study was obtained from Keele University (UK) Ethical Review  
19  
20 353 Panel.

## 23 354 **REFERENCES**

- 26 355 (1) Jordan KM, Sawyer S, Coakley P, Smith HE, Cooper C, Arden NK. The use of  
27 356 conventional and complementary treatments for knee osteoarthritis in the community.  
28 357 *Rheumatology (Oxford)* 2004;43(3):381-4.
- 30 358 (2) Jinks C, Ong BN, Richardson J. A mixed methods study to investigate needs assessment  
31 359 for knee pain and disability: population and individual perspectives. *BMC Musculoskelet*  
32 360 *Disord* 2007;8:59.
- 34 361 (3) Thorstensson CA, Gooberman-Hill R, Adamson J, Williams S, Dieppe P. Help-seeking  
35 362 behaviour among people living with chronic hip or knee pain in the community. *BMC*  
36 363 *Musculoskelet Disord* 2009;10:153.
- 38 364 (4) National Institute for Health and Care Excellence. Osteoarthritis: care and management  
39 365 in adults. 2014;CG177.
- 41 366 (5) Cottrell E, Roddy E, Foster NE. The attitudes, beliefs and behaviours of GPs regarding  
42 367 exercise for chronic knee pain: a systematic review. *BMC Fam Pract* 2010;11(4).
- 44 368 (6) Vos T, Barber RM, Bell B, Bertozzi-Villa A, Biryukov S, Bolliger I, et al. Global, regional,  
45 369 and national incidence, prevalence, and years lived with disability for 301 acute and chronic  
46 370 diseases and injuries in 188 countries, 1990–2013: a systematic analysis for the Global  
47 371 Burden of Disease Study 2013. *Lancet* 2015 2016/03;386(9995):743-800.
- 49 372 (7) Jordan KP, Kadam UT, Hayward R, Porcheret M, Young C, Croft P. Annual consultation  
50 373 prevalence of regional musculoskeletal problems in primary care: an observational study.  
51 374 *BMC Musculoskelet Disord* 2010;11:144.
- 53 375 (8) Arthritis Research UK National Primary Care Centre. Musculoskeletal matters.  
54 376 Consultations for selected diagnoses and regional problems. Musculoskeletal Matters  
55 377 2010;Bulletin 2.

- 1  
2  
3 378 (9) McAlindon TE, Bannuru RR, Sullivan MC, Arden NK, Berenbaum F, Bierma-Zeinstra SM,  
4 379 et al. OARSI guidelines for the non-surgical management of knee osteoarthritis.  
5 380 *Osteoarthritis Cartilage* 2014;22(3):363-88.
- 6  
7 381 (10) National Institute for Health and Care Excellence. Osteoarthritis NICE quality standard.  
8 382 QS87 ed. <http://www.nice.org.uk/guidance/qs87>: NICE; 2015.
- 9  
10 383 (11) French SD, Bennell KL, Nicolson PJ, Hodges PW, Dobson FL, Hinman RS. What do  
11 384 people with knee or hip osteoarthritis need to know? An international consensus list of  
12 385 essential statements for osteoarthritis. *Arthritis Care Res (Hoboken)* 2015 May;67(6):809-16.
- 13  
14 386 (12) Uthman OA, van der Windt DA, Jordan J, Dziedzic KS, Healey EL, Peat GM, et al.  
15 387 Exercise for lower limb osteoarthritis: systematic review incorporating trial sequential  
16 388 analysis and network meta-analysis. *BMJ* 2013;347:f5555.
- 17  
18 389 (13) Mazieres B, Thevenon A, Coudeyre E, Chevalier X, Revel M, Rannou F. Adherence to,  
19 390 and results of, physical therapy programs in patients with hip or knee osteoarthritis.  
20 391 Development of French clinical practice guidelines. *Joint Bone Spine* 2008;75(5):589-96.
- 21  
22 392 (14) Ajzen I. The theory of planned behavior. *Organ Behav Hum Decis Process* 1991  
23 393 12;50(2):179-211.
- 24  
25 394 (15) Michie S, Johnston M, Abraham C, Lawton R, Parker D, Walker A, et al. Making  
26 395 psychological theory useful for implementing evidence based practice: a consensus  
27 396 approach. *Qual Saf Health Care* 2005;14(1):26-33.
- 28  
29 397 (16) Godin G, Bélanger-Gravel A, Eccles M, Grimshaw J. Healthcare professionals'  
30 398 intentions and behaviours: a systematic review of studies based on social cognitive theories.  
31 399 *Implement Sci* 2008;3:36.
- 32  
33 400 (17) Cottrell E, Roddy E, Rathod T, Porcheret M, Foster NE. What influences general  
34 401 practitioners' use of exercise for patients with chronic knee pain? Results from a national  
35 402 survey. *BMC Fam Pract.* 2016;17:172.
- 36  
37 403 (18) Cottrell E, Roddy E, Rathod T, Thomas E, Porcheret M, Foster NE. Maximising  
38 404 response from GPs to questionnaire surveys: do length or incentives make a difference?  
39 405 *BMC Med Res Methodol* 2015;15(1):3.
- 40  
41 406 (19) Holden MA, Nicholls EE, Young J, Hay EM, Foster NE. UK-based physical therapists'  
42 407 attitudes and beliefs regarding exercise and knee osteoarthritis: findings from a mixed-  
43 408 methods study. *Arthritis Rheum* 2009;61(11):1511-21.
- 44  
45 409 (20) Holden MA, Nicholls EE, Young J, Hay EM, Foster NE. Role of exercise for knee pain:  
46 410 what do older adults in the community think? *Arthritis Care Res (Hoboken)*  
47 411 2012;64(10):1554-64.
- 48  
49 412 (21) Roddy E, Zhang W, Doherty M, Arden NK, Barlow J, Birrell F, et al. Evidence-based  
50 413 recommendations for the role of exercise in the management of osteoarthritis of the hip or  
51 414 knee - the MOVE consensus. *Rheumatology (Oxford)* 2005;44(1):67-73.
- 52  
53 415 (22) Zar J. Biostatistical analysis. 4th ed.: Prentice Hall; 1998.
- 54  
55  
56  
57  
58  
59  
60

- 1  
2  
3 416 (23) Northern Ireland Statistics & Research Agency. Northern Ireland Multiple Deprivation  
4 417 Measure 2010. 2010; Available at: [http://www.nisra.gov.uk/deprivation/nimdm\\_2010.htm](http://www.nisra.gov.uk/deprivation/nimdm_2010.htm).  
5 418 Accessed January/06, 2015.
- 6  
7 419 (24) Department for Communities and Local Government. English indices of deprivation  
8 420 2010. 2011; . Accessed December/12, 2014.
- 9  
10 421 (25) Welsh Government. Welsh Index of Multiple Deprivation (WIMD). 2014; Available at:  
11 422 <http://wales.gov.uk/statistics-and-research/welsh-index-multiple-deprivation/?lang=en>.  
12 423 Accessed January/06, 2015.
- 13  
14 424 (26) The Scottish Government. Scottish Index of Multiple Deprivation. 2014; Available at:  
15 425 <http://www.scotland.gov.uk/Topics/Statistics/SIMD>. Accessed December/12, 2014.
- 16  
17 426 (27) Mercer C, Jackson A, Moore A. Developing clinical guidelines for the physiotherapy  
18 427 management of whiplash associated disorder (WAD). *Int J Osteopath Med* 2007  
19 428 2014/12;10(2):50-4.
- 20  
21 429 (28) Fernandes L, Hagen KB, Bijlsma JWW, Andreassen O, Christensen P, Conaghan PG, et  
22 430 al. EULAR recommendations for the non-pharmacological core management of hip and knee  
23 431 osteoarthritis. *Ann Rheum Dis* 2013;72(7):1125-35.
- 24  
25 432 (29) Arshad A, Rashid R, Das Gupta E. A survey of the primary care management of  
26 433 osteoarthritis in Malaysia: a view from a rheumatologist's perspective. *Int J Rheum Dis*  
27 434 2008;11(3):246-50.
- 28  
29 435 (30) Richette P, Hilliquin P, Bertin P, Carni P, Berger V, Marty M. Comparison of general  
30 436 practitioners and rheumatologists' prescription patterns for patients with knee osteoarthritis.  
31 437 *BMC Musculoskelet Disord* 2011;12:72.
- 32  
33 438 (31) Maserejian NN, Fischer MA, Trachtenberg FL, Yu J, Marceau LD, McKinlay JB, et al.  
34 439 Variations among primary care physicians in exercise advice, imaging, and analgesics for  
35 440 musculoskeletal pain: Results from a factorial experiment. *Arthritis Care Res (Hoboken)*  
36 441 2014;66(1):147-56.
- 37  
38 442 (32) Bedson J, Jordon K, Croft P. How do GPs use x rays to manage chronic knee pain in  
39 443 the elderly? A case study. *Ann Rheum Dis* 2003;62(5):450-4.
- 40  
41 444 (33) Porcheret M, Jordan K, Croft P. Treatment of knee pain in older adults in primary care:  
42 445 development of an evidence-based model of care. *Rheumatology (Oxford)* 2007;46(4):638-  
43 446 48.
- 44  
45 447 (34) Dexter PA. Joint exercises in elderly persons with symptomatic osteoarthritis of the hip  
46 448 or knee. Performance patterns, medical support patterns, and the relationship between  
47 449 exercising and medical care. *Arthritis Care Res* 1992;5(1):36-41.
- 48  
49 450 (35) Mazucca SA, Brandt KD, Katz BP, Dittus RS, Freund DA, Lubitz R, et al. Comparison of  
50 451 general internists, family physicians and rheumatologists managing patients with symptoms  
51 452 of osteoarthritis of the knee. *Arthritis Care Res* 1997;10(5):289-99.
- 52  
53 453 (36) Glauser TA, Salinas GD, Roepke NL, Chad Williamson J, Reese A, Gutierrez G, et al.  
54 454 Management of mild-to-moderate osteoarthritis: a study of the primary care perspective.  
55 455 *Postgrad Med* 2011;123(1):126-34.

1  
2  
3  
4  
5  
6  
7  
8  
9  
10  
11  
12  
13  
14  
15  
16  
17  
18  
19  
20  
21  
22  
23  
24  
25  
26  
27  
28  
29  
30  
31  
32  
33  
34  
35  
36  
37  
38  
39  
40  
41  
42  
43  
44  
45  
46  
47  
48  
49  
50  
51  
52  
53  
54  
55  
56  
57  
58  
59  
60

- 456 (37) Mamlin LA, Melfi CA, Parchman ML, Gutierrez B, Allen DI, Katz BP, et al. Management  
457 of osteoarthritis of the knee by primary care physicians. *Arch Fam Med* 1998;7(6):563-7.
- 458 (38) Holden MA, Nicholls EE, Young J, Hay EM, Foster NE. Exercise and physical activity in  
459 older adults with knee pain: a mixed methods study. *Rheumatology (Oxford)* 2015;54(3):413-  
460 23.
- 461 (39) O'Connor SR, Tully MA, Ryan B, Bleakley CM, Baxter GD, Bradley JM, et al. Walking  
462 exercise for chronic musculoskeletal pain: systematic review and meta-analysis. *Arch Phys  
463 Med Rehabil* 2015;96(4):724-34.e3.
- 464 (40) Hendry M, Williams NH, Markland D, Wilkinson C, Maddison P. Why should we  
465 exercise when our knees hurt? A qualitative study of primary care patients with osteoarthritis  
466 of the knee. *Fam Pract* 2006;23(5):558-67.
- 467 (41) Bossen D, Veenhof C, Dekker J, de Bakker D. The usability and preliminary  
468 effectiveness of a web-based physical activity intervention in patients with knee and/or hip  
469 osteoarthritis. *BMC Med Inform Decis Mak* 2013;13(1):1-8.
- 470 (42) Deranianian CA, Desai P, Smith-Ray R, Seymour RB, Hughes SL. Perceived versus  
471 actual factors associated with adoption and maintenance of an evidence-based physical  
472 activity program. *Transl Behav Med* 2012;2(2):209-17.
- 473 (43) Holden MA, Nicholls EE, Hay EM, Foster NE. Physical therapists' use of therapeutic  
474 exercise for patients with clinical knee osteoarthritis in the United Kingdom: in line with  
475 current recommendations? *Phys Ther* 2008;88(10):1109-21.
- 476 (44) Bedson J, Mottram S, Thomas E, Peat G. Knee pain and osteoarthritis in the general  
477 population: what influences patients to consult? *Fam Pract* 2007;24(5):443-53.
- 478 (45) Peabody JW, Luck J, Glassman P, Dresselhaus TR, Lee M. Comparison of vignettes,  
479 standardized patients, and chart abstraction: a prospective validation study of 3 methods for  
480 measuring quality. *JAMA* 2000;283(13):1715-22.
- 481 (46) Norcini J. Back to the future: clinical vignettes and the measurement of physician  
482 performance. *Ann Intern Med* 2004;141(10):813-4.
- 483 (47) Veloski J, Tai S, Evans AS, Nash DB. Clinical vignette-based surveys: a tool for  
484 assessing physician practice variation. *Am J Med Qual* 2005;20(3):151-7.
- 485 (48) Peabody JW, Liu A. A cross-national comparison of the quality of clinical care using  
486 vignettes. *Health Policy Plan* 2007;22(5):294-302.
- 487 (49) Conner M, Norman P. Predicting and changing health behaviour: research and practice  
488 with social cognition models. 3rd Ed. ed. Maidenhead: Open University Press; 2015.
- 489 (50) Khan KM, Weiler R, Blair SN. Prescribing exercise in primary care: ten practical steps  
490 on how to do it. *BMJ* 2011;343:806-7.
- 491 (51) Peterson JA. Get moving! Physical activity counseling in primary care. *J Am Acad  
492 Nurse Pract* 2007;19(7):349-57.

- 1  
2  
3 493 (52) Grandes G, Sanchez A, Sanchez-Pinilla RO, Torcal J, Montoya I, Lizarraga K, et al.  
4 494 Effectiveness of physical activity advice and prescription by physicians in routine primary  
5 495 care: a cluster randomized trial. *Arch Intern Med* 2009;169(7):694-701.
- 6  
7 496 (53) Professional Associations for Physical Activity (Sweden). Physical activity in the  
8 497 prevention and treatment of disease. Sweden: Swedish National Institute of Public Health;  
9 498 2010.
- 10  
11 499 (54) Patel A, Schofield GM, Kolt GS, Keogh JW. General practitioners' views and  
12 500 experiences of counselling for physical activity through the New Zealand Green Prescription  
13 501 program. *BMC Fam Pract* 2011;12:119.
- 14  
15 502 (55) Morden A, Jinks C, Ong BN, Porcheret M, Dziedzic KS. Acceptability of a 'guidebook'  
16 503 for the management of Osteoarthritis: a qualitative study of patient and clinician's  
17 504 perspectives. *BMC Musculoskelet Disord* 2014;15:427.
- 18  
19 505 (56) Keele University, Arthritis Research UK, National Institute for Health Research. A guide  
20 506 for people who have osteoarthritis. 2014; Available at:  
21 507 [http://www.keele.ac.uk/media/keeleuniversity/ri/primarycare/pdfs/OA\\_Guidebook.pdf](http://www.keele.ac.uk/media/keeleuniversity/ri/primarycare/pdfs/OA_Guidebook.pdf).  
22 508 Accessed July/03, 2015.
- 23  
24 509 (57) Arthritis Research UK. Osteoarthritis of the knee. Chesterfield. Available at:  
25 510 [http://www.arthritisresearchuk.org/arthritis-information/conditions/osteoarthritis-of-the-](http://www.arthritisresearchuk.org/arthritis-information/conditions/osteoarthritis-of-the-knee.aspx)  
26 511 [knee.aspx](http://www.arthritisresearchuk.org/arthritis-information/conditions/osteoarthritis-of-the-knee.aspx); Arthritis Research UK; 2013.
- 27  
28 512 (58) Gore M, Tai KS, Sadosky A, Leslie D, Stacey BR. Use and costs of prescription  
29 513 medications and alternative treatments in patients with osteoarthritis and chronic low back  
30 514 pain in community-based settings. *Pain Pract* 2012;12(7):550-60.
- 31  
32 515 (59) Brand CA, Harrison C, Tropea J, Hinman RS, Britt H, Bennell K. Management of  
33 516 osteoarthritis in general practice in Australia. *Arthritis Care Res (Hoboken)* 2014;66(4):551-8.
- 34  
35 517 (60) Wilkie R, Blagojevic-Bucknall M, Jordan KP, Lacey R, McBeth J. Reasons why  
36 518 multimorbidity increases the risk of participation restriction in older adults with lower  
37 519 extremity osteoarthritis: a prospective cohort study in primary care. *Arthritis Care Res*  
38 520 *(Hoboken)* 2013;65(6):910-9.
- 39  
40 521 (61) Goodwin N, Curry N, Naylor C, Ross S, Duldig W. Managing people with long-term  
41 522 conditions. The Kings Fund 2010:98.
- 42  
43 523 (62) Hay EM, Foster NE, Thomas E, Peat G, Phelan M, Yates HE, et al. Effectiveness of  
44 524 community physiotherapy and enhanced pharmacy review for knee pain in people aged over  
45 525 55 presenting to primary care: pragmatic randomised trial. *BMJ* 2006 Nov 11;333(7576):995.
- 46  
47 526 (63) Hurley MV, Walsh NE, Mitchell HL, Pimm TJ, Patel A, Williamson E, et al. Clinical  
48 527 effectiveness of a rehabilitation program integrating exercise, self-management, and active  
49 528 coping strategies for chronic knee pain: a cluster randomized trial. *Arthritis Rheum*  
50 529 2007;57(7):1211-9.
- 51  
52 530 (64) Dziedzic KS, Healey EL, Porcheret M, Ong BN, Main CJ, Jordan KP, et al.  
53 531 Implementing the NICE osteoarthritis guidelines: a mixed methods study and cluster  
54 532 randomised trial of a model osteoarthritis consultation in primary care--the Management of  
55 533 OsteoArthritis In Consultations (MOSAICS) study protocol. *Implement Sci* 2014;9(1):95.

- 1  
2  
3 534 (65) Bury TJ, Stokes EK. Direct access and patient/client self-referral to physiotherapy: a  
4 535 review of contemporary practice within the European Union. *Physiotherapy* 2013;99(4):285-  
5 536 91.
- 6  
7 537 (66) NHS England. Technology Enabled Care Services (TECS). Launch of technology  
8 538 enabled care services (TECS) resource for commissioners. Available at:  
9 539 <https://www.england.nhs.uk/ourwork/qual-clin-lead/tecs/>. Accessed April/05, 2016.
- 10  
11 540 (67) Rawstorn JC, Gant N, Direito A, Beckmann C, Maddison R. Telehealth exercise-based  
12 541 cardiac rehabilitation: a systematic review and meta-analysis. *Heart* 2016 Mar 2.
- 13  
14 542 (68) Hoaas H, Andreassen HK, Lien LA, Hjalmarsen A, Zanaboni P. Adherence and factors  
15 543 affecting satisfaction in long-term telerehabilitation for patients with chronic obstructive  
16 544 pulmonary disease: a mixed methods study. *BMC Med Inform Decis Mak* 2016 Feb  
17 545 25;16(1):26-016-0264-9.

18  
19 546 **FIGURES**

- 20  
21  
22 547 Figure 1 Flow-chart summarising the exercise types and initiation methods used by GPs' for  
23  
24 548 the vignette patient with CKP
- 25  
26  
27 549 Figure 2 Barriers to using exercise reported by GPs
- 28  
29  
30  
31  
32  
33  
34  
35  
36  
37  
38  
39  
40  
41  
42  
43  
44  
45  
46  
47  
48  
49  
50  
51  
52  
53  
54  
55  
56  
57  
58  
59  
60

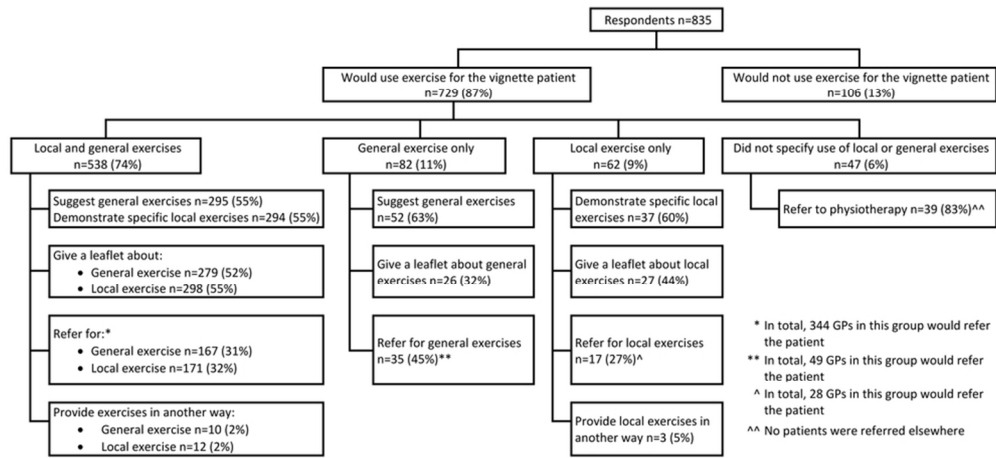

Figure 1 Flow-chart summarising the exercise types and initiation methods used by GPs' for the vignette patient with CKP

84x40mm (300 x 300 DPI)

1  
2  
3  
4  
5  
6  
7  
8  
9  
10  
11  
12  
13  
14  
15  
16  
17  
18  
19  
20  
21  
22  
23  
24  
25  
26  
27  
28  
29  
30  
31  
32  
33  
34  
35  
36  
37  
38  
39  
40  
41  
42  
43  
44  
45  
46  
47  
48  
49  
50  
51  
52  
53  
54  
55  
56  
57  
58  
59  
60

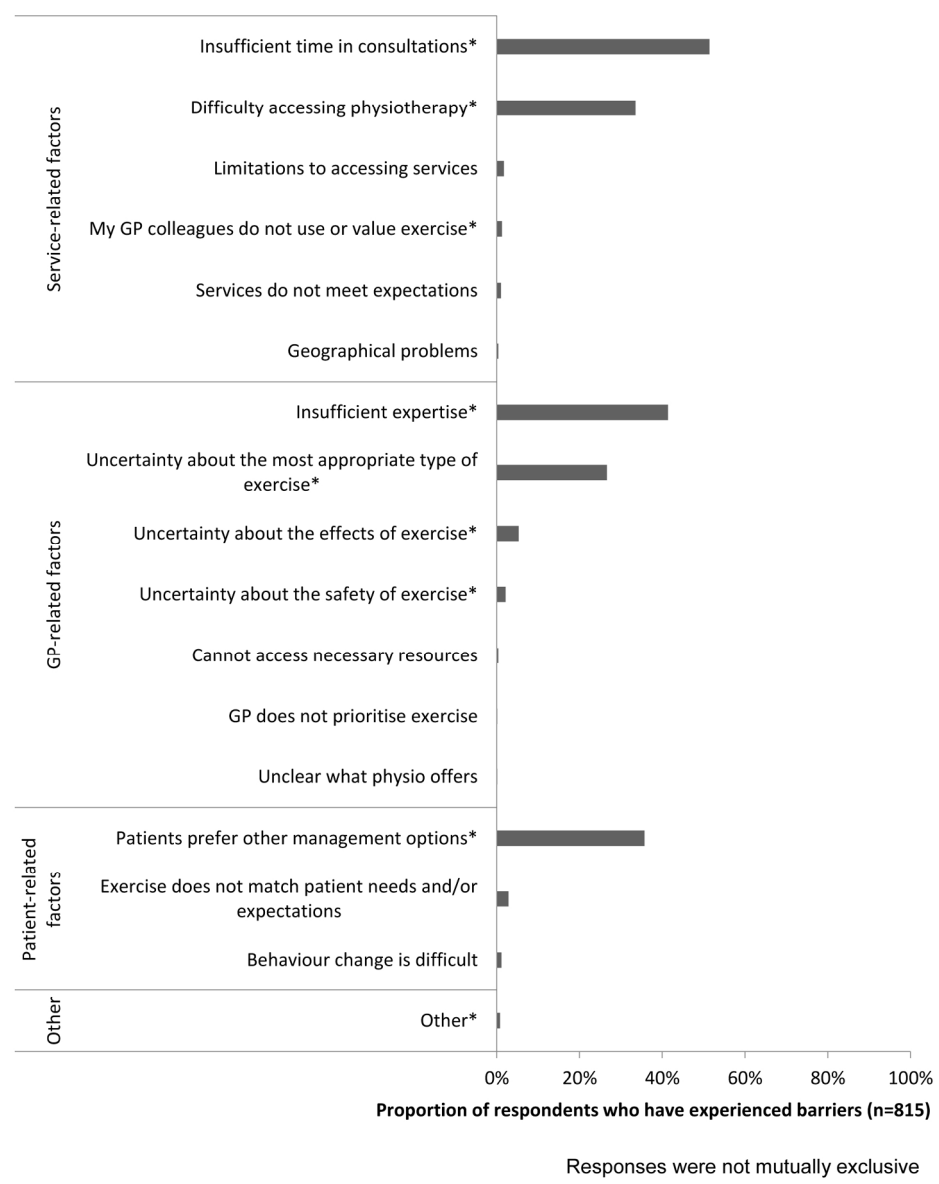

Figure 2 Barriers to using exercise reported by GPs [asterisks denote barriers provided as a multiple response option in the questionnaire]

169x209mm (300 x 300 DPI)



## Management of Chronic Knee Pain Study

We are seeking the views of general practitioners who treat patients over 45 years old, with chronic knee pain.

If you **are not** a general practitioner, please tick this box and return the questionnaire without completing it any further

If you **have not** managed someone with chronic knee pain in the last 6 months, please tick this box and return the questionnaire without completing it any further.

This questionnaire should take no more than **20 minutes** to complete.

Return of your completed questionnaire will be interpreted as you providing your consent to participate in this study.

If you would like to participate in this study please either:

- Complete this paper version of the questionnaire and return it to Dr Elizabeth Cottrell, Academic Clinical Fellow GP Specialty Trainee, at the Arthritis Research UK Primary Care Centre, Keele University, Staffordshire, ST5 5BG using the enclosed FREEPOST envelope.  
OR

- Complete the online version of this questionnaire accessible at [https://www.surveymonkey.com/s/Management\\_CKP](https://www.surveymonkey.com/s/Management_CKP)

If you have any questions about this questionnaire or the study in general you can email Dr Elizabeth Cottrell at [e.cottrell@keele.ac.uk](mailto:e.cottrell@keele.ac.uk)

### Instructions for completing this questionnaire

- When completing the questionnaire, please try and provide answers that most accurately reflect your usual clinical practice. There are no 'correct' or 'incorrect' answers.
- Where relevant please answer questions by ticking a box e.g.
- Please do not consult any literature while completing this questionnaire.

**Thank you for your help with this study**

Unique  
survey ID

## Section 1: About you

1.1 Please state the year in which you qualified as a General Practitioner

1.2 How many General Practitioners work in your practice (including yourself)?

1.3 How do you best **describe yourself** (please tick **one box** only)

- GP Partner       Salaried GP       Locum GP  
 Other, please specify

1.4 Is your practice  Urban       Semi-rural       Rural

1.5 Are you  Male       Female

1.6 Are you a **GP with a special interest (GPwSI)** in musculoskeletal conditions?

- Yes       No

1.7 Do you remember receiving any specific postgraduate musculoskeletal training which contained education about chronic knee pain? (By this we do not mean clinical placements or jobs in rheumatology or orthopaedics)

- Yes       No

1.8 Do you have, or have you ever suffered from chronic knee pain **yourself**?

- Yes       No

## Section 2: Clinical scenario of a patient with chronic knee pain

Presented below is a clinical scenario of a patient **with chronic knee pain** who presents to you with this problem for the first time. All questions that follow relate to the care you would give this particular patient. Think about the patient's first consultation with you.

**Patient:** Mrs Jones, 58-year-old Prison Officer

**History:** First presentation of gradually worsening bilateral knee pain (right worse than left) over 2 years  
 No history of trauma  
 Pain always present when walking and at rest, worst when climbing stairs. No night pain.  
 Managing activities of daily living. Difficulty gardening.  
 Stopped going to gym – thinks was making pain worse  
 Only treatment tried is Ibuprofen once or twice when pain "really bad" – no benefit.  
 Came today finding work increasingly difficult due to the stairs  
 Usually well – no comorbidities

**Medication:** Nil

**Examination:** Body Mass Index 33  
 Knees – bilaterally no effusions. Joint tenderness upon palpation. Bilateral coarse crepitations.  
 Slightly reduced flexion of the right knee.  
 Hips – no abnormality detected

2.1 What **diagnosis** would you make at this point?

---

2.2 Using the words you would use with the patient, **briefly** state how you would **describe your diagnosis** to the patient

---



---



---

2.3 The patient's **symptoms** are: (please tick the **one** box that best reflects your opinion)

- Very severe     Severe     Moderate     Mild     Very mild

2.4 It is most likely that this patient's symptoms result from **knee damage** that is: (please tick the **one** box that best reflects your opinion)

- Very severe     Severe     Moderate     Mild     Very mild

2.5 Using the words you would use with the patient, **briefly** describe **what the future is likely to hold** with regards to her knee problem

---



---

2.6 What **investigation(s)/assessment(s)** would you do/order for this patient **at this point** and for what reason?

| Please tick <b>all</b> you would undertake             | Please indicate the reason for choosing this investigation (tick all that apply) |                           |                          |                          |                          |                          |
|--------------------------------------------------------|----------------------------------------------------------------------------------|---------------------------|--------------------------|--------------------------|--------------------------|--------------------------|
|                                                        | Reassure patient                                                                 | To meet referral criteria | Confirm diagnosis        | Inform treatment         | Rule out other diagnoses | Inform prognosis         |
| <input type="checkbox"/> None                          | ---                                                                              | ---                       | ---                      | ---                      | ---                      | ---                      |
| <input type="checkbox"/> Blood tests                   | <input type="checkbox"/>                                                         | <input type="checkbox"/>  | <input type="checkbox"/> | <input type="checkbox"/> | <input type="checkbox"/> | <input type="checkbox"/> |
| <input type="checkbox"/> Oxford knee score             | <input type="checkbox"/>                                                         | <input type="checkbox"/>  | <input type="checkbox"/> | <input type="checkbox"/> | <input type="checkbox"/> | <input type="checkbox"/> |
| <input type="checkbox"/> Knee x-ray                    | <input type="checkbox"/>                                                         | <input type="checkbox"/>  | <input type="checkbox"/> | <input type="checkbox"/> | <input type="checkbox"/> | <input type="checkbox"/> |
| <input type="checkbox"/> Other - please state<br>_____ | <input type="checkbox"/>                                                         | <input type="checkbox"/>  | <input type="checkbox"/> | <input type="checkbox"/> | <input type="checkbox"/> | <input type="checkbox"/> |

2.7 **At this consultation**, what approaches would you use, or suggest, to manage this patient? (please tick **all** that apply)

- |                                                        |                                                                      |                                                                     |                                                                   |
|--------------------------------------------------------|----------------------------------------------------------------------|---------------------------------------------------------------------|-------------------------------------------------------------------|
| <input type="checkbox"/> Ice                           | <input type="checkbox"/> Keep active                                 | <input type="checkbox"/> Weak opioids (e.g. codeine)                | <input type="checkbox"/> Topical NSAID                            |
| <input type="checkbox"/> Heat                          | <input type="checkbox"/> Provision of walking stick(s)               | <input type="checkbox"/> COX II inhibitor                           | <input type="checkbox"/> Paracetamol                              |
| <input type="checkbox"/> Acupuncture                   | <input type="checkbox"/> Advice on footwear                          | <input type="checkbox"/> Antidepressants                            | <input type="checkbox"/> Glucosamine/chondroitin                  |
| <input type="checkbox"/> Rest                          | <input type="checkbox"/> Exercise                                    | <input type="checkbox"/> Injection of steroids                      | <input type="checkbox"/> Topical capsaicin                        |
| <input type="checkbox"/> Weight loss                   | <input type="checkbox"/> Bed rest                                    | <input type="checkbox"/> Oral non-selective NSAIDs (e.g. Ibuprofen) | <input type="checkbox"/> Strong opioids (e.g. morphine, Tramadol) |
| <input type="checkbox"/> None                          | <input type="checkbox"/> Transcutaneous electrical nerve stimulation |                                                                     |                                                                   |
| <input type="checkbox"/> Other (please state)<br>_____ |                                                                      |                                                                     |                                                                   |

**If you ticked "Exercise" in question 2.7 please go on to answer question 2.8. If not, please move straight on to question 2.9**

2.8 There are a variety of approaches that can be used to manage chronic knee pain in general practice.

Of the following different approaches, **which, if any, would you use for this patient at this point?**

- a) General exercises or increasing physical activity
- I would use  If you **would use** this strategy, please give details about what you would **actually do** (please tick any that apply)
- Suggest general exercises  Please state type of exercise \_\_\_\_\_
- Give a leaflet \_\_\_\_\_
- Refer \_\_\_\_\_
- Other  Please state what other actions you would do \_\_\_\_\_

I would **not** use  If you **would not use** the strategy **but would like to**, please tell us **what prevents** you (please tick any that apply)

Insufficient expertise  Insufficient time

Other  Please state what other reasons prevent you (e.g. patient factors, access difficulties, uncertainty of benefit etc) \_\_\_\_\_

- b) Local knee or quadriceps strengthening exercises
- I would use  If you **would use** this strategy, please give details about what you would **actually do** (please tick any that apply)
- Demonstrate specific exercises
- Give a leaflet \_\_\_\_\_
- Refer \_\_\_\_\_
- Other  Please state what other actions you would do \_\_\_\_\_

I would **not** use  If you **would not use** the strategy **but would like to**, please tell us **what prevents** you (please tick any that apply)

Insufficient expertise  Insufficient time

Other  Please state what other reasons prevent you (e.g. patient factors, access difficulties, uncertainty of benefit etc) \_\_\_\_\_

- c) Follow up patient to check to see if she is undertaking exercise on a regular basis
- I would use  If you **would use** this strategy, please give details about what you would **actually do** (please tick any that apply)
- Planned follow-up  When Please define number of days/weeks/months \_\_\_\_\_
- How  Face to face  Via telephone
- With whom  Yourself  Another professional or service – please state \_\_\_\_\_

Opportunistic follow-up  When  If patient fails to improve  Check when patient is next seen with this or any problem

Other  Please state what other actions you would do \_\_\_\_\_

I would **not** use  If you **would not use** the strategy **but would like to**, please tell us **what prevents** you (please tick any that apply)

Insufficient expertise  Insufficient time

Other  Please state what other reasons prevent you \_\_\_\_\_

2.9 Would you refer the patient to see someone else, either in the primary or community team or into secondary care, at this point?  Yes  No

If yes, to whom would you refer her?

---

2.10 Do you usually provide **written information** for patients in this situation?  Yes  No

If yes, please state the source of your written information

Patient.co.uk or Emis Mentor  Arthritis Research UK (previously known as ARC) or Arthritis Care  Other, please state \_\_\_\_\_

If you would provide written information, it would be very helpful to see a copy by returning it in the freepost envelope provided (**please write on your unique survey ID**) or by providing us with the link for any online information you access.

We are interested in your clinical opinion about patients **aged 45 years and over** with **chronic knee pain**. In this age group chronic knee pain is almost always due to knee osteoarthritis. Please answer all of the following questions using the definition of chronic knee pain as follows: knee pain and associated symptoms that have been present for more than 3 months not resulting from a fracture, infection, systemic rheumatological problem, metastases or surgery.

### Section 3: Chronic knee pain in general practice

|                                                                                                                                                                         | I have never heard about or read it | I have heard of it but not seen it | I have seen it but not read it | I have read the full guideline and/or summary | I have read and consider the guideline when planning management |
|-------------------------------------------------------------------------------------------------------------------------------------------------------------------------|-------------------------------------|------------------------------------|--------------------------------|-----------------------------------------------|-----------------------------------------------------------------|
| 3.1 How much have you heard about or read the guideline published by NICE in 2008 for the care and management of osteoarthritis in adults? (please tick <b>one</b> box) | <input type="checkbox"/>            | <input type="checkbox"/>           | <input type="checkbox"/>       | <input type="checkbox"/>                      | <input type="checkbox"/>                                        |

Please consider **your role** in managing patients aged over 45 years old with chronic knee pain. Please indicate the extent to which you agree or disagree with the statements given by ticking **one** box per row.

|                                                                                                    | Strongly disagree        | Disagree                 | Neither agree or disagree | Agree                    | Strongly agree           |
|----------------------------------------------------------------------------------------------------|--------------------------|--------------------------|---------------------------|--------------------------|--------------------------|
| 3.2 It is part of my job to manage people with chronic knee pain                                   | <input type="checkbox"/> | <input type="checkbox"/> | <input type="checkbox"/>  | <input type="checkbox"/> | <input type="checkbox"/> |
| 3.3 I have enough time to manage patients with chronic knee pain                                   | <input type="checkbox"/> | <input type="checkbox"/> | <input type="checkbox"/>  | <input type="checkbox"/> | <input type="checkbox"/> |
| 3.4 Managing patients with chronic knee pain is a priority for me                                  | <input type="checkbox"/> | <input type="checkbox"/> | <input type="checkbox"/>  | <input type="checkbox"/> | <input type="checkbox"/> |
| 3.5 Managing patients with chronic knee pain is of clinical interest to me                         | <input type="checkbox"/> | <input type="checkbox"/> | <input type="checkbox"/>  | <input type="checkbox"/> | <input type="checkbox"/> |
| 3.6 It is part of my job to reassure patients about the safety of exercise for chronic knee pain   | <input type="checkbox"/> | <input type="checkbox"/> | <input type="checkbox"/>  | <input type="checkbox"/> | <input type="checkbox"/> |
| 3.7 It is part of my job to provide patients with chronic knee pain with a written management plan | <input type="checkbox"/> | <input type="checkbox"/> | <input type="checkbox"/>  | <input type="checkbox"/> | <input type="checkbox"/> |

- |     | I have no role in including exercise in the management                                                                                                                                                                | I inform patients that exercise is a management option                       | I advise patients to use exercise to manage their knee pain                      | I recommend the types of exercise patients could use               | I give information on the type, frequency and duration of specific exercises |
|-----|-----------------------------------------------------------------------------------------------------------------------------------------------------------------------------------------------------------------------|------------------------------------------------------------------------------|----------------------------------------------------------------------------------|--------------------------------------------------------------------|------------------------------------------------------------------------------|
| 3.8 | Which statement best describes your role in including exercise in the management plan of a patient with chronic knee pain? (please tick <b>one</b> box)                                                               |                                                                              |                                                                                  |                                                                    |                                                                              |
|     | <input type="checkbox"/>                                                                                                                                                                                              | <input type="checkbox"/>                                                     | <input type="checkbox"/>                                                         | <input type="checkbox"/>                                           | <input type="checkbox"/>                                                     |
| 3.9 | We are interested to hear about <b>your experiences of barriers which might prevent the use of exercise</b> in your management of chronic knee pain. Please tick <b>all</b> of the barriers that you have experienced |                                                                              |                                                                                  |                                                                    |                                                                              |
|     | <input type="checkbox"/> Insufficient time in consultations                                                                                                                                                           | <input type="checkbox"/> Insufficient expertise to give detailed information | <input type="checkbox"/> Difficulty accessing physiotherapy                      | <input type="checkbox"/> Uncertainty about the effects of exercise |                                                                              |
|     | <input type="checkbox"/> Patients prefer other management options                                                                                                                                                     | <input type="checkbox"/> My GP colleagues do not use or value exercise       | <input type="checkbox"/> Uncertainty about the most appropriate type of exercise | <input type="checkbox"/> Uncertainty about the safety of exercise  |                                                                              |
|     | <input type="checkbox"/> Other (please state) _____                                                                                                                                                                   |                                                                              |                                                                                  |                                                                    |                                                                              |
|     | _____                                                                                                                                                                                                                 |                                                                              |                                                                                  |                                                                    |                                                                              |

## Section 4: Your views about chronic knee pain

Below is a list of **possible causes** for a patient developing chronic knee pain. Please indicate the extent to which you agree or disagree with these causes by ticking **one** box in each row.

|      |                                                                    | Strongly disagree        | Disagree                 | Neither agree or disagree | Agree                    | Strongly agree           |
|------|--------------------------------------------------------------------|--------------------------|--------------------------|---------------------------|--------------------------|--------------------------|
| 4.1  | Hereditary/runs in the family                                      | <input type="checkbox"/> | <input type="checkbox"/> | <input type="checkbox"/>  | <input type="checkbox"/> | <input type="checkbox"/> |
| 4.2  | Being overweight/obese                                             | <input type="checkbox"/> | <input type="checkbox"/> | <input type="checkbox"/>  | <input type="checkbox"/> | <input type="checkbox"/> |
| 4.3  | A person's own mental attitude e.g. thinking about life negatively | <input type="checkbox"/> | <input type="checkbox"/> | <input type="checkbox"/>  | <input type="checkbox"/> | <input type="checkbox"/> |
| 4.4  | A person's emotional state e.g. feeling down, anxious              | <input type="checkbox"/> | <input type="checkbox"/> | <input type="checkbox"/>  | <input type="checkbox"/> | <input type="checkbox"/> |
| 4.5  | Ageing                                                             | <input type="checkbox"/> | <input type="checkbox"/> | <input type="checkbox"/>  | <input type="checkbox"/> | <input type="checkbox"/> |
| 4.6  | Accident or injury                                                 | <input type="checkbox"/> | <input type="checkbox"/> | <input type="checkbox"/>  | <input type="checkbox"/> | <input type="checkbox"/> |
| 4.7  | Manual work                                                        | <input type="checkbox"/> | <input type="checkbox"/> | <input type="checkbox"/>  | <input type="checkbox"/> | <input type="checkbox"/> |
| 4.8  | Sport                                                              | <input type="checkbox"/> | <input type="checkbox"/> | <input type="checkbox"/>  | <input type="checkbox"/> | <input type="checkbox"/> |
| 4.9  | Osteoarthritis                                                     | <input type="checkbox"/> | <input type="checkbox"/> | <input type="checkbox"/>  | <input type="checkbox"/> | <input type="checkbox"/> |
| 4.10 | Changes consistent with osteoarthritis seen on x-ray               | <input type="checkbox"/> | <input type="checkbox"/> | <input type="checkbox"/>  | <input type="checkbox"/> | <input type="checkbox"/> |

When completing the following questions, please consider patients **aged over 45 years old** with **chronic knee pain**. Please indicate the extent to which you agree or disagree with the statements given by ticking one box per row.

|      |                                                                                                                              | Totally disagree         | Largely disagree         | Disagree to some extent  | Agree to some extent     | Largely agree            | Totally agree            |
|------|------------------------------------------------------------------------------------------------------------------------------|--------------------------|--------------------------|--------------------------|--------------------------|--------------------------|--------------------------|
| 4.11 | Mental stress can cause chronic knee pain even in the absence of tissue damage                                               | <input type="checkbox"/> | <input type="checkbox"/> | <input type="checkbox"/> | <input type="checkbox"/> | <input type="checkbox"/> | <input type="checkbox"/> |
| 4.12 | The cause of chronic knee pain is unknown                                                                                    | <input type="checkbox"/> | <input type="checkbox"/> | <input type="checkbox"/> | <input type="checkbox"/> | <input type="checkbox"/> | <input type="checkbox"/> |
| 4.13 | Pain is a nociceptive stimulus, indicating tissue damage                                                                     | <input type="checkbox"/> | <input type="checkbox"/> | <input type="checkbox"/> | <input type="checkbox"/> | <input type="checkbox"/> | <input type="checkbox"/> |
| 4.14 | A patient suffering from severe chronic knee pain will benefit from physical exercise                                        | <input type="checkbox"/> | <input type="checkbox"/> | <input type="checkbox"/> | <input type="checkbox"/> | <input type="checkbox"/> | <input type="checkbox"/> |
| 4.15 | Functional limitations associated with chronic knee pain are the result of psychosocial factors                              | <input type="checkbox"/> | <input type="checkbox"/> | <input type="checkbox"/> | <input type="checkbox"/> | <input type="checkbox"/> | <input type="checkbox"/> |
| 4.16 | Patients with chronic knee pain should preferably practice only pain free movements                                          | <input type="checkbox"/> | <input type="checkbox"/> | <input type="checkbox"/> | <input type="checkbox"/> | <input type="checkbox"/> | <input type="checkbox"/> |
| 4.17 | Therapy may have been successful even if pain remains                                                                        | <input type="checkbox"/> | <input type="checkbox"/> | <input type="checkbox"/> | <input type="checkbox"/> | <input type="checkbox"/> | <input type="checkbox"/> |
| 4.18 | Chronic knee pain indicates the presence of organic injury                                                                   | <input type="checkbox"/> | <input type="checkbox"/> | <input type="checkbox"/> | <input type="checkbox"/> | <input type="checkbox"/> | <input type="checkbox"/> |
| 4.19 | If chronic knee pain increases in severity, I immediately adjust the intensity of my treatment accordingly                   | <input type="checkbox"/> | <input type="checkbox"/> | <input type="checkbox"/> | <input type="checkbox"/> | <input type="checkbox"/> | <input type="checkbox"/> |
| 4.20 | If therapy does not result in a reduction in chronic knee pain, there is a high risk of severe restrictions in the long term | <input type="checkbox"/> | <input type="checkbox"/> | <input type="checkbox"/> | <input type="checkbox"/> | <input type="checkbox"/> | <input type="checkbox"/> |
| 4.21 | Pain reduction is a precondition for the restoration of normal functioning                                                   | <input type="checkbox"/> | <input type="checkbox"/> | <input type="checkbox"/> | <input type="checkbox"/> | <input type="checkbox"/> | <input type="checkbox"/> |
| 4.22 | Increased pain indicates new tissue damage or the spread of existing damage                                                  | <input type="checkbox"/> | <input type="checkbox"/> | <input type="checkbox"/> | <input type="checkbox"/> | <input type="checkbox"/> | <input type="checkbox"/> |
| 4.23 | There is no effective treatment to eliminate chronic knee pain                                                               | <input type="checkbox"/> | <input type="checkbox"/> | <input type="checkbox"/> | <input type="checkbox"/> | <input type="checkbox"/> | <input type="checkbox"/> |
| 4.24 | Even if the pain has worsened, the intensity of the next treatment can be increased                                          | <input type="checkbox"/> | <input type="checkbox"/> | <input type="checkbox"/> | <input type="checkbox"/> | <input type="checkbox"/> | <input type="checkbox"/> |
| 4.25 | If patients complain of pain during exercise, I worry that damage is being caused                                            | <input type="checkbox"/> | <input type="checkbox"/> | <input type="checkbox"/> | <input type="checkbox"/> | <input type="checkbox"/> | <input type="checkbox"/> |
| 4.26 | The severity of tissue damage determines the level of pain                                                                   | <input type="checkbox"/> | <input type="checkbox"/> | <input type="checkbox"/> | <input type="checkbox"/> | <input type="checkbox"/> | <input type="checkbox"/> |
| 4.27 | Learning to cope with stress promotes recovery from chronic knee pain                                                        | <input type="checkbox"/> | <input type="checkbox"/> | <input type="checkbox"/> | <input type="checkbox"/> | <input type="checkbox"/> | <input type="checkbox"/> |
| 4.28 | Exercises that may be knee straining should <u>not</u> be avoided                                                            | <input type="checkbox"/> | <input type="checkbox"/> | <input type="checkbox"/> | <input type="checkbox"/> | <input type="checkbox"/> | <input type="checkbox"/> |
| 4.29 | In the long run, patients with chronic knee pain have a higher risk of developing severe functional impairments              | <input type="checkbox"/> | <input type="checkbox"/> | <input type="checkbox"/> | <input type="checkbox"/> | <input type="checkbox"/> | <input type="checkbox"/> |

## Section 5: Your views about the role of exercise in treating chronic knee pain

We are interested in your views about the **role of exercise** in the treatment of **chronic knee pain in patients over 45 years old**. Please indicate the extent to which you agree or disagree with the statements given by ticking one box per row.

|      |                                                                                                                   | Strongly disagree        | Disagree                 | Neither agree or disagree | Agree                    | Strongly agree           |
|------|-------------------------------------------------------------------------------------------------------------------|--------------------------|--------------------------|---------------------------|--------------------------|--------------------------|
| 5.1  | GPs should prescribe quadriceps strengthening exercises to every patient with chronic knee pain                   | <input type="checkbox"/> | <input type="checkbox"/> | <input type="checkbox"/>  | <input type="checkbox"/> | <input type="checkbox"/> |
| 5.2  | GPs should prescribe general exercise, for example, walking or swimming, for every patient with chronic knee pain | <input type="checkbox"/> | <input type="checkbox"/> | <input type="checkbox"/>  | <input type="checkbox"/> | <input type="checkbox"/> |
| 5.3  | Knee problems are improved by quadriceps strengthening exercises                                                  | <input type="checkbox"/> | <input type="checkbox"/> | <input type="checkbox"/>  | <input type="checkbox"/> | <input type="checkbox"/> |
| 5.4  | Knee problems are improved by general exercise, for example walking or swimming                                   | <input type="checkbox"/> | <input type="checkbox"/> | <input type="checkbox"/>  | <input type="checkbox"/> | <input type="checkbox"/> |
| 5.5  | Quadriceps strengthening exercises for the knee are safe for everybody to do                                      | <input type="checkbox"/> | <input type="checkbox"/> | <input type="checkbox"/>  | <input type="checkbox"/> | <input type="checkbox"/> |
| 5.6  | General exercise, for example walking or swimming is safe for everybody to do                                     | <input type="checkbox"/> | <input type="checkbox"/> | <input type="checkbox"/>  | <input type="checkbox"/> | <input type="checkbox"/> |
| 5.7  | Exercise for chronic knee pain is most beneficial when it is tailored to meet individual patient needs            | <input type="checkbox"/> | <input type="checkbox"/> | <input type="checkbox"/>  | <input type="checkbox"/> | <input type="checkbox"/> |
| 5.8  | A standard set of exercises is sufficient for every patient with chronic knee problems                            | <input type="checkbox"/> | <input type="checkbox"/> | <input type="checkbox"/>  | <input type="checkbox"/> | <input type="checkbox"/> |
| 5.9  | GPs should educate chronic knee pain patients about how to change their lifestyle for the better                  | <input type="checkbox"/> | <input type="checkbox"/> | <input type="checkbox"/>  | <input type="checkbox"/> | <input type="checkbox"/> |
| 5.10 | It is important that people with chronic knee pain increase their overall activity levels                         | <input type="checkbox"/> | <input type="checkbox"/> | <input type="checkbox"/>  | <input type="checkbox"/> | <input type="checkbox"/> |
| 5.11 | How well a patient complies with their exercise programme determines how effective it will be                     | <input type="checkbox"/> | <input type="checkbox"/> | <input type="checkbox"/>  | <input type="checkbox"/> | <input type="checkbox"/> |
| 5.12 | GPs should follow up patients to monitor extent of continuation of exercises                                      | <input type="checkbox"/> | <input type="checkbox"/> | <input type="checkbox"/>  | <input type="checkbox"/> | <input type="checkbox"/> |
| 5.13 | It is the patient's own responsibility to continue doing their exercise programme                                 | <input type="checkbox"/> | <input type="checkbox"/> | <input type="checkbox"/>  | <input type="checkbox"/> | <input type="checkbox"/> |
| 5.14 | Exercise is effective for patients if an x-ray shows severe knee osteoarthritis                                   | <input type="checkbox"/> | <input type="checkbox"/> | <input type="checkbox"/>  | <input type="checkbox"/> | <input type="checkbox"/> |
| 5.15 | Exercise works just as well for everybody, regardless of the amount of pain they have                             | <input type="checkbox"/> | <input type="checkbox"/> | <input type="checkbox"/>  | <input type="checkbox"/> | <input type="checkbox"/> |
| 5.16 | Increasing the strength of the muscles around the knee stops the knee problem getting worse                       | <input type="checkbox"/> | <input type="checkbox"/> | <input type="checkbox"/>  | <input type="checkbox"/> | <input type="checkbox"/> |
| 5.17 | Increasing overall activity levels stops the knee problem getting worse                                           | <input type="checkbox"/> | <input type="checkbox"/> | <input type="checkbox"/>  | <input type="checkbox"/> | <input type="checkbox"/> |
| 5.18 | Exercise for chronic knee pain is more effectively provided by physiotherapists than GPs                          | <input type="checkbox"/> | <input type="checkbox"/> | <input type="checkbox"/>  | <input type="checkbox"/> | <input type="checkbox"/> |
| 5.19 | Time constraints prevent GPs from providing advice on individual exercises for chronic knee pain                  | <input type="checkbox"/> | <input type="checkbox"/> | <input type="checkbox"/>  | <input type="checkbox"/> | <input type="checkbox"/> |
| 5.20 | Exercise for chronic knee pain should preferably be used after drug treatment has been tried                      | <input type="checkbox"/> | <input type="checkbox"/> | <input type="checkbox"/>  | <input type="checkbox"/> | <input type="checkbox"/> |
| 5.21 | Exercise for chronic knee pain would be used more frequently if access to physiotherapy was easier                | <input type="checkbox"/> | <input type="checkbox"/> | <input type="checkbox"/>  | <input type="checkbox"/> | <input type="checkbox"/> |



1 **Would you be happy for us to contact you again in the future regarding this study?**

2

3 Yes

4

5 No

6  
7 **If you answered YES to the question above please provide your name and contact details**  
8 **below (these details will be kept separately from your responses to the questionnaire):**  
9

|                                     |  |
|-------------------------------------|--|
| 10 <b>Name:</b>                     |  |
| 11                                  |  |
| 12                                  |  |
| 13 <b>Daytime telephone number:</b> |  |
| 14                                  |  |
| 15                                  |  |
| 16 <b>Address:</b>                  |  |
| 17                                  |  |
| 18                                  |  |
| 19                                  |  |
| 20                                  |  |
| 21                                  |  |
| 22                                  |  |
| 23                                  |  |
| 24                                  |  |
| 25                                  |  |
| 26 <b>Email:</b>                    |  |
| 27                                  |  |
| 28                                  |  |
| 29                                  |  |

30  
31 **End of Questionnaire**

32  
33 You have reached the end of the questionnaire. Please return the questionnaire in the  
34 **FREEPOST** envelope provided.

35  
36 If you have any questions about this questionnaire or the study in general, you can email  
37 Dr Elizabeth Cottrell at [e.cottrell@keele.ac.uk](mailto:e.cottrell@keele.ac.uk)  
38

39  
40 **Thank you for taking the time to complete this questionnaire. Your**  
41 **time and participation is greatly appreciated.**  
42  
43  
44  
45  
46  
47  
48  
49  
50  
51  
52  
53  
54  
55  
56  
57

58
